# Supplementary material
Source: ML conference proceedings conference paper supplement (https://openreview.net/forum?id=kDqH5KmRWR)
Supplement: supplementary_material [file question_demo.xlsx]

## Sheet: Sheet1
id	filename	measure_id	question	correct_answer	category	audio_path	xml	agent_answer
1	3e5e3cb3b417a1cf1baa10af4927b709_3级A项小练习曲 Op.68 No.14_0	15	Measure 15 has an equal number of matched and missing notes.	TRUE	Completeness	mm/3e5e3cb3b417a1cf1baa10af4927b709_3级A项小练习曲 Op.68 No.14_0.mp3	<measure number="15" width="169.74"><note print-object="no"> <rest /> <duration>3</duration> <voice>1</voice> <type>quarter</type> <dot /> <staff>1</staff> </note> <note default-x="89.16" default-y="-25.00"> <pitch> <step>A</step> <octave>4</octave> </pitch> <duration>1</duration> <voice>1</voice> <type>eighth</type> <stem>up</stem> <staff>1</staff> <beam number="1">begin</beam> </note> <note def…
2	3e5e3cb3b417a1cf1baa10af4927b709_3级A项小练习曲 Op.68 No.14_0	15	Measure 15 indicates possible key accuracy issues.	TRUE	Key Accuracy	mm/3e5e3cb3b417a1cf1baa10af4927b709_3级A项小练习曲 Op.68 No.14_0.mp3	<measure number="15" width="169.74"><note print-object="no"> <rest /> <duration>3</duration> <voice>1</voice> <type>quarter</type> <dot /> <staff>1</staff> </note> <note default-x="89.16" default-y="-25.00"> <pitch> <step>A</step> <octave>4</octave> </pitch> <duration>1</duration> <voice>1</voice> <type>eighth</type> <stem>up</stem> <staff>1</staff> <beam number="1">begin</beam> </note> <note def…
3	3e5e3cb3b417a1cf1baa10af4927b709_3级A项小练习曲 Op.68 No.14_0	15	Measure 15's speed stability is stable.	TRUE	Stability	mm/3e5e3cb3b417a1cf1baa10af4927b709_3级A项小练习曲 Op.68 No.14_0.mp3	<measure number="15" width="169.74"><note print-object="no"> <rest /> <duration>3</duration> <voice>1</voice> <type>quarter</type> <dot /> <staff>1</staff> </note> <note default-x="89.16" default-y="-25.00"> <pitch> <step>A</step> <octave>4</octave> </pitch> <duration>1</duration> <voice>1</voice> <type>eighth</type> <stem>up</stem> <staff>1</staff> <beam number="1">begin</beam> </note> <note def…
4	3e5e3cb3b417a1cf1baa10af4927b709_3级A项小练习曲 Op.68 No.14_0	15	Measure 15's speed is significantly slow.	TRUE	Rhythm	mm/3e5e3cb3b417a1cf1baa10af4927b709_3级A项小练习曲 Op.68 No.14_0.mp3	<measure number="15" width="169.74"><note print-object="no"> <rest /> <duration>3</duration> <voice>1</voice> <type>quarter</type> <dot /> <staff>1</staff> </note> <note default-x="89.16" default-y="-25.00"> <pitch> <step>A</step> <octave>4</octave> </pitch> <duration>1</duration> <voice>1</voice> <type>eighth</type> <stem>up</stem> <staff>1</staff> <beam number="1">begin</beam> </note> <note def…
5	3e5e3cb3b417a1cf1baa10af4927b709_3级A项小练习曲 Op.68 No.14_0	11	Measure 11 has exactly two matched notes.	TRUE	Completeness	mm/3e5e3cb3b417a1cf1baa10af4927b709_3级A项小练习曲 Op.68 No.14_0.mp3	<measure number="11" width="233.83"><print new-system="yes"> <system-layout> <system-margins> <left-margin>14.94</left-margin> <right-margin>0.00</right-margin> </system-margins> <system-distance>85.00</system-distance> </system-layout> <staff-layout number="2"> <staff-distance>65.00</staff-distance> </staff-layout> </print> <note print-object="no"> <rest /> <duration>3</duration> <voice>1</voice…
6	3e5e3cb3b417a1cf1baa10af4927b709_3级A项小练习曲 Op.68 No.14_0	11	Measure 11 explicitly confirms full key accuracy.	FALSE	Key Accuracy	mm/3e5e3cb3b417a1cf1baa10af4927b709_3级A项小练习曲 Op.68 No.14_0.mp3	<measure number="11" width="233.83"><print new-system="yes"> <system-layout> <system-margins> <left-margin>14.94</left-margin> <right-margin>0.00</right-margin> </system-margins> <system-distance>85.00</system-distance> </system-layout> <staff-layout number="2"> <staff-distance>65.00</staff-distance> </staff-layout> </print> <note print-object="no"> <rest /> <duration>3</duration> <voice>1</voice…
7	3e5e3cb3b417a1cf1baa10af4927b709_3级A项小练习曲 Op.68 No.14_0	11	Measure 11 attributes instability to inconsistent key press timing.	TRUE	Stability	mm/3e5e3cb3b417a1cf1baa10af4927b709_3级A项小练习曲 Op.68 No.14_0.mp3	<measure number="11" width="233.83"><print new-system="yes"> <system-layout> <system-margins> <left-margin>14.94</left-margin> <right-margin>0.00</right-margin> </system-margins> <system-distance>85.00</system-distance> </system-layout> <staff-layout number="2"> <staff-distance>65.00</staff-distance> </staff-layout> </print> <note print-object="no"> <rest /> <duration>3</duration> <voice>1</voice…
8	3e5e3cb3b417a1cf1baa10af4927b709_3级A项小练习曲 Op.68 No.14_0	11	Measure 11's speed is in line with the standard.	TRUE	Rhythm	mm/3e5e3cb3b417a1cf1baa10af4927b709_3级A项小练习曲 Op.68 No.14_0.mp3	<measure number="11" width="233.83"><print new-system="yes"> <system-layout> <system-margins> <left-margin>14.94</left-margin> <right-margin>0.00</right-margin> </system-margins> <system-distance>85.00</system-distance> </system-layout> <staff-layout number="2"> <staff-distance>65.00</staff-distance> </staff-layout> </print> <note print-object="no"> <rest /> <duration>3</duration> <voice>1</voice…
9	3e5e3cb3b417a1cf1baa10af4927b709_3级A项小练习曲 Op.68 No.14_0	5	Measure 5 has more missing notes than matched notes.	TRUE	Completeness	mm/3e5e3cb3b417a1cf1baa10af4927b709_3级A项小练习曲 Op.68 No.14_0.mp3	<measure number="5" width="159.15"><note print-object="no"> <rest /> <duration>3</duration> <voice>1</voice> <type>quarter</type> <dot /> <staff>1</staff> </note> <direction placement="below"> <direction-type> <wedge type="crescendo" number="1" default-y="-60.50" /> </direction-type> <staff>1</staff> </direction> <note default-x="82.81" default-y="5.00"> <pitch> <step>G</step> <octave>5</octave> …
10	3e5e3cb3b417a1cf1baa10af4927b709_3级A项小练习曲 Op.68 No.14_0	5	Measure 5's key accuracy description highlights potential errors with specific colored notes.	TRUE	Key Accuracy	mm/3e5e3cb3b417a1cf1baa10af4927b709_3级A项小练习曲 Op.68 No.14_0.mp3	<measure number="5" width="159.15"><note print-object="no"> <rest /> <duration>3</duration> <voice>1</voice> <type>quarter</type> <dot /> <staff>1</staff> </note> <direction placement="below"> <direction-type> <wedge type="crescendo" number="1" default-y="-60.50" /> </direction-type> <staff>1</staff> </direction> <note default-x="82.81" default-y="5.00"> <pitch> <step>G</step> <octave>5</octave> …
11	3e5e3cb3b417a1cf1baa10af4927b709_3级A项小练习曲 Op.68 No.14_0	5	Measure 5's description states its playing speed remained stable.	TRUE	Stability	mm/3e5e3cb3b417a1cf1baa10af4927b709_3级A项小练习曲 Op.68 No.14_0.mp3	<measure number="5" width="159.15"><note print-object="no"> <rest /> <duration>3</duration> <voice>1</voice> <type>quarter</type> <dot /> <staff>1</staff> </note> <direction placement="below"> <direction-type> <wedge type="crescendo" number="1" default-y="-60.50" /> </direction-type> <staff>1</staff> </direction> <note default-x="82.81" default-y="5.00"> <pitch> <step>G</step> <octave>5</octave> …
12	3e5e3cb3b417a1cf1baa10af4927b709_3级A项小练习曲 Op.68 No.14_0	5	Measure 5's rhythm description attributes its performance to being significantly slower.	TRUE	Rhythm	mm/3e5e3cb3b417a1cf1baa10af4927b709_3级A项小练习曲 Op.68 No.14_0.mp3	<measure number="5" width="159.15"><note print-object="no"> <rest /> <duration>3</duration> <voice>1</voice> <type>quarter</type> <dot /> <staff>1</staff> </note> <direction placement="below"> <direction-type> <wedge type="crescendo" number="1" default-y="-60.50" /> </direction-type> <staff>1</staff> </direction> <note default-x="82.81" default-y="5.00"> <pitch> <step>G</step> <octave>5</octave> …
13	3e5e3cb3b417a1cf1baa10af4927b709_3级A项小练习曲 Op.68 No.14_0	10	Measure 10 has exactly 5 correctly matched notes.	TRUE	Completeness	mm/3e5e3cb3b417a1cf1baa10af4927b709_3级A项小练习曲 Op.68 No.14_0.mp3	<measure number="10" width="170.87"><note print-object="no"> <rest /> <duration>3</duration> <voice>1</voice> <type>quarter</type> <dot /> <staff>1</staff> </note> <note default-x="89.84" default-y="-25.00"> <pitch> <step>A</step> <octave>4</octave> </pitch> <duration>1</duration> <voice>1</voice> <type>eighth</type> <stem>up</stem> <staff>1</staff> <beam number="1">begin</beam> </note> <note def…
14	3e5e3cb3b417a1cf1baa10af4927b709_3级A项小练习曲 Op.68 No.14_0	10	Measure 10's description highlights potential key accuracy errors.	TRUE	Key Accuracy	mm/3e5e3cb3b417a1cf1baa10af4927b709_3级A项小练习曲 Op.68 No.14_0.mp3	<measure number="10" width="170.87"><note print-object="no"> <rest /> <duration>3</duration> <voice>1</voice> <type>quarter</type> <dot /> <staff>1</staff> </note> <note default-x="89.84" default-y="-25.00"> <pitch> <step>A</step> <octave>4</octave> </pitch> <duration>1</duration> <voice>1</voice> <type>eighth</type> <stem>up</stem> <staff>1</staff> <beam number="1">begin</beam> </note> <note def…
15	3e5e3cb3b417a1cf1baa10af4927b709_3级A项小练习曲 Op.68 No.14_0	10	Measure 10's speed stability meets the reference standard.	FALSE	Stability	mm/3e5e3cb3b417a1cf1baa10af4927b709_3级A项小练习曲 Op.68 No.14_0.mp3	<measure number="10" width="170.87"><note print-object="no"> <rest /> <duration>3</duration> <voice>1</voice> <type>quarter</type> <dot /> <staff>1</staff> </note> <note default-x="89.84" default-y="-25.00"> <pitch> <step>A</step> <octave>4</octave> </pitch> <duration>1</duration> <voice>1</voice> <type>eighth</type> <stem>up</stem> <staff>1</staff> <beam number="1">begin</beam> </note> <note def…
16	3e5e3cb3b417a1cf1baa10af4927b709_3级A项小练习曲 Op.68 No.14_0	10	Measure 10 was played faster than the intended speed.	FALSE	Rhythm	mm/3e5e3cb3b417a1cf1baa10af4927b709_3级A项小练习曲 Op.68 No.14_0.mp3	<measure number="10" width="170.87"><note print-object="no"> <rest /> <duration>3</duration> <voice>1</voice> <type>quarter</type> <dot /> <staff>1</staff> </note> <note default-x="89.84" default-y="-25.00"> <pitch> <step>A</step> <octave>4</octave> </pitch> <duration>1</duration> <voice>1</voice> <type>eighth</type> <stem>up</stem> <staff>1</staff> <beam number="1">begin</beam> </note> <note def…
17	3e5e3cb3b417a1cf1baa10af4927b709_3级A项小练习曲 Op.68 No.14_0	8	Measure 8 has no missing notes.	TRUE	Completeness	mm/3e5e3cb3b417a1cf1baa10af4927b709_3级A项小练习曲 Op.68 No.14_0.mp3	<measure number="8" width="174.37"><direction placement="below"> <direction-type> <wedge type="diminuendo" number="1" default-y="-98.14" /> </direction-type> <staff>1</staff> </direction> <note default-x="16.50" default-y="-55.00" print-object="no"> <cue /> <pitch> <step>B</step> <octave>3</octave> </pitch> <duration>1</duration> <voice>1</voice> <type>eighth</type> <stem>down</stem> <staff>1</st…
18	3e5e3cb3b417a1cf1baa10af4927b709_3级A项小练习曲 Op.68 No.14_0	8	Is the note in Section 8 accurate?	TRUE	Key Accuracy	mm/3e5e3cb3b417a1cf1baa10af4927b709_3级A项小练习曲 Op.68 No.14_0.mp3	<measure number="8" width="174.37"><direction placement="below"> <direction-type> <wedge type="diminuendo" number="1" default-y="-98.14" /> </direction-type> <staff>1</staff> </direction> <note default-x="16.50" default-y="-55.00" print-object="no"> <cue /> <pitch> <step>B</step> <octave>3</octave> </pitch> <duration>1</duration> <voice>1</voice> <type>eighth</type> <stem>down</stem> <staff>1</st…
19	3e5e3cb3b417a1cf1baa10af4927b709_3级A项小练习曲 Op.68 No.14_0	8	Measure 8 has unstable playing speed.	FALSE	Stability	mm/3e5e3cb3b417a1cf1baa10af4927b709_3级A项小练习曲 Op.68 No.14_0.mp3	<measure number="8" width="174.37"><direction placement="below"> <direction-type> <wedge type="diminuendo" number="1" default-y="-98.14" /> </direction-type> <staff>1</staff> </direction> <note default-x="16.50" default-y="-55.00" print-object="no"> <cue /> <pitch> <step>B</step> <octave>3</octave> </pitch> <duration>1</duration> <voice>1</voice> <type>eighth</type> <stem>down</stem> <staff>1</st…
20	3e5e3cb3b417a1cf1baa10af4927b709_3级A项小练习曲 Op.68 No.14_0	8	Measure 8's speed states it was significantly slower than required.	TRUE	Rhythm	mm/3e5e3cb3b417a1cf1baa10af4927b709_3级A项小练习曲 Op.68 No.14_0.mp3	<measure number="8" width="174.37"><direction placement="below"> <direction-type> <wedge type="diminuendo" number="1" default-y="-98.14" /> </direction-type> <staff>1</staff> </direction> <note default-x="16.50" default-y="-55.00" print-object="no"> <cue /> <pitch> <step>B</step> <octave>3</octave> </pitch> <duration>1</duration> <voice>1</voice> <type>eighth</type> <stem>down</stem> <staff>1</st…
21	3e5e3cb3b417a1cf1baa10af4927b709_3级A项小练习曲 Op.68 No.14_1	42	Measure 42 has no missing notes.	TRUE	Completeness	mm/3e5e3cb3b417a1cf1baa10af4927b709_3级A项小练习曲 Op.68 No.14_1.mp3	<measure number="42" width="192.42"><direction placement="below"> <direction-type> <wedge type="diminuendo" number="1" default-y="-68.49" /> </direction-type> <staff>1</staff> </direction> <note> <rest /> <duration>3</duration> <voice>1</voice> <type>quarter</type> <dot /> <staff>1</staff> <notations> <slur type="start" placement="above" number="1" /> </notations> </note> <note default-x="103.82"…
22	3e5e3cb3b417a1cf1baa10af4927b709_3级A项小练习曲 Op.68 No.14_1	42	Is the note in Section 42 accurate?	TRUE	Key Accuracy	mm/3e5e3cb3b417a1cf1baa10af4927b709_3级A项小练习曲 Op.68 No.14_1.mp3	<measure number="42" width="192.42"><direction placement="below"> <direction-type> <wedge type="diminuendo" number="1" default-y="-68.49" /> </direction-type> <staff>1</staff> </direction> <note> <rest /> <duration>3</duration> <voice>1</voice> <type>quarter</type> <dot /> <staff>1</staff> <notations> <slur type="start" placement="above" number="1" /> </notations> </note> <note default-x="103.82"…
23	3e5e3cb3b417a1cf1baa10af4927b709_3级A项小练习曲 Op.68 No.14_1	42	Measure 42's stability evaluation falls below its reference value.	TRUE	Stability	mm/3e5e3cb3b417a1cf1baa10af4927b709_3级A项小练习曲 Op.68 No.14_1.mp3	<measure number="42" width="192.42"><direction placement="below"> <direction-type> <wedge type="diminuendo" number="1" default-y="-68.49" /> </direction-type> <staff>1</staff> </direction> <note> <rest /> <duration>3</duration> <voice>1</voice> <type>quarter</type> <dot /> <staff>1</staff> <notations> <slur type="start" placement="above" number="1" /> </notations> </note> <note default-x="103.82"…
24	3e5e3cb3b417a1cf1baa10af4927b709_3级A项小练习曲 Op.68 No.14_1	42	Measure 42's desired speed confirms it is in line with the standard	TRUE	Rhythm	mm/3e5e3cb3b417a1cf1baa10af4927b709_3级A项小练习曲 Op.68 No.14_1.mp3	<measure number="42" width="192.42"><direction placement="below"> <direction-type> <wedge type="diminuendo" number="1" default-y="-68.49" /> </direction-type> <staff>1</staff> </direction> <note> <rest /> <duration>3</duration> <voice>1</voice> <type>quarter</type> <dot /> <staff>1</staff> <notations> <slur type="start" placement="above" number="1" /> </notations> </note> <note default-x="103.82"…
25	3e5e3cb3b417a1cf1baa10af4927b709_3级A项小练习曲 Op.68 No.14_1	35	Measure 35 has no missing notes.	TRUE	Completeness	mm/3e5e3cb3b417a1cf1baa10af4927b709_3级A项小练习曲 Op.68 No.14_1.mp3	<measure number="35" width="281.72"><note print-object="no"> <rest /> <duration>3</duration> <voice>1</voice> <type>quarter</type> <dot /> <staff>1</staff> </note> <note default-x="146.46" default-y="-35.00"> <pitch> <step>F</step> <alter>1</alter> <octave>4</octave> </pitch> <duration>1</duration> <voice>1</voice> <type>eighth</type> <stem>up</stem> <staff>1</staff> <beam number="1">begin</beam>…
26	3e5e3cb3b417a1cf1baa10af4927b709_3级A项小练习曲 Op.68 No.14_1	35	Measure 35 states keys were pressed accurately.	TRUE	Key Accuracy	mm/3e5e3cb3b417a1cf1baa10af4927b709_3级A项小练习曲 Op.68 No.14_1.mp3	<measure number="35" width="281.72"><note print-object="no"> <rest /> <duration>3</duration> <voice>1</voice> <type>quarter</type> <dot /> <staff>1</staff> </note> <note default-x="146.46" default-y="-35.00"> <pitch> <step>F</step> <alter>1</alter> <octave>4</octave> </pitch> <duration>1</duration> <voice>1</voice> <type>eighth</type> <stem>up</stem> <staff>1</staff> <beam number="1">begin</beam>…
27	3e5e3cb3b417a1cf1baa10af4927b709_3级A项小练习曲 Op.68 No.14_1	35	Measure 35 has stable playing speed.	TRUE	Stability	mm/3e5e3cb3b417a1cf1baa10af4927b709_3级A项小练习曲 Op.68 No.14_1.mp3	<measure number="35" width="281.72"><note print-object="no"> <rest /> <duration>3</duration> <voice>1</voice> <type>quarter</type> <dot /> <staff>1</staff> </note> <note default-x="146.46" default-y="-35.00"> <pitch> <step>F</step> <alter>1</alter> <octave>4</octave> </pitch> <duration>1</duration> <voice>1</voice> <type>eighth</type> <stem>up</stem> <staff>1</staff> <beam number="1">begin</beam>…
28	3e5e3cb3b417a1cf1baa10af4927b709_3级A项小练习曲 Op.68 No.14_1	35	Measure 35's speed is in line with the standard.	TRUE	Rhythm	mm/3e5e3cb3b417a1cf1baa10af4927b709_3级A项小练习曲 Op.68 No.14_1.mp3	<measure number="35" width="281.72"><note print-object="no"> <rest /> <duration>3</duration> <voice>1</voice> <type>quarter</type> <dot /> <staff>1</staff> </note> <note default-x="146.46" default-y="-35.00"> <pitch> <step>F</step> <alter>1</alter> <octave>4</octave> </pitch> <duration>1</duration> <voice>1</voice> <type>eighth</type> <stem>up</stem> <staff>1</staff> <beam number="1">begin</beam>…
29	3e5e3cb3b417a1cf1baa10af4927b709_3级A项小练习曲 Op.68 No.14_1	31	Measure 31 has no missing notes.	TRUE	Completeness	mm/3e5e3cb3b417a1cf1baa10af4927b709_3级A项小练习曲 Op.68 No.14_1.mp3	<measure number="31" width="216.47"><note print-object="no"> <rest /> <duration>3</duration> <voice>1</voice> <type>quarter</type> <dot /> <staff>1</staff> </note> <note default-x="113.84" default-y="-25.00"> <pitch> <step>A</step> <octave>4</octave> </pitch> <duration>1</duration> <voice>1</voice> <type>eighth</type> <stem>up</stem> <staff>1</staff> <beam number="1">begin</beam> </note> <note de…
30	3e5e3cb3b417a1cf1baa10af4927b709_3级A项小练习曲 Op.68 No.14_1	31	Measure 31 states keys were pressed accurately.	TRUE	Key Accuracy	mm/3e5e3cb3b417a1cf1baa10af4927b709_3级A项小练习曲 Op.68 No.14_1.mp3	<measure number="31" width="216.47"><note print-object="no"> <rest /> <duration>3</duration> <voice>1</voice> <type>quarter</type> <dot /> <staff>1</staff> </note> <note default-x="113.84" default-y="-25.00"> <pitch> <step>A</step> <octave>4</octave> </pitch> <duration>1</duration> <voice>1</voice> <type>eighth</type> <stem>up</stem> <staff>1</staff> <beam number="1">begin</beam> </note> <note de…
31	3e5e3cb3b417a1cf1baa10af4927b709_3级A项小练习曲 Op.68 No.14_1	31	Measure 31 has stable playing speed.	TRUE	Stability	mm/3e5e3cb3b417a1cf1baa10af4927b709_3级A项小练习曲 Op.68 No.14_1.mp3	<measure number="31" width="216.47"><note print-object="no"> <rest /> <duration>3</duration> <voice>1</voice> <type>quarter</type> <dot /> <staff>1</staff> </note> <note default-x="113.84" default-y="-25.00"> <pitch> <step>A</step> <octave>4</octave> </pitch> <duration>1</duration> <voice>1</voice> <type>eighth</type> <stem>up</stem> <staff>1</staff> <beam number="1">begin</beam> </note> <note de…
32	3e5e3cb3b417a1cf1baa10af4927b709_3级A项小练习曲 Op.68 No.14_1	31	Measure 31's speed is in line with the standard.	TRUE	Rhythm	mm/3e5e3cb3b417a1cf1baa10af4927b709_3级A项小练习曲 Op.68 No.14_1.mp3	<measure number="31" width="216.47"><note print-object="no"> <rest /> <duration>3</duration> <voice>1</voice> <type>quarter</type> <dot /> <staff>1</staff> </note> <note default-x="113.84" default-y="-25.00"> <pitch> <step>A</step> <octave>4</octave> </pitch> <duration>1</duration> <voice>1</voice> <type>eighth</type> <stem>up</stem> <staff>1</staff> <beam number="1">begin</beam> </note> <note de…
33	3e5e3cb3b417a1cf1baa10af4927b709_3级A项小练习曲 Op.68 No.14_1	39	Does measure 39 have any missing notes?	FALSE	Completeness	mm/3e5e3cb3b417a1cf1baa10af4927b709_3级A项小练习曲 Op.68 No.14_1.mp3	<measure number="39" width="166.16"><note print-object="no"> <rest /> <duration>3</duration> <voice>1</voice> <type>quarter</type> <dot /> <staff>1</staff> </note> <note default-x="87.01" default-y="-25.00"> <pitch> <step>A</step> <octave>4</octave> </pitch> <duration>1</duration> <voice>1</voice> <type>eighth</type> <stem>up</stem> <staff>1</staff> <beam number="1">begin</beam> <notations> <slur…
34	3e5e3cb3b417a1cf1baa10af4927b709_3级A项小练习曲 Op.68 No.14_1	39	Does measure 39 have accurate key presses?	TRUE	Key Accuracy	mm/3e5e3cb3b417a1cf1baa10af4927b709_3级A项小练习曲 Op.68 No.14_1.mp3	<measure number="39" width="166.16"><note print-object="no"> <rest /> <duration>3</duration> <voice>1</voice> <type>quarter</type> <dot /> <staff>1</staff> </note> <note default-x="87.01" default-y="-25.00"> <pitch> <step>A</step> <octave>4</octave> </pitch> <duration>1</duration> <voice>1</voice> <type>eighth</type> <stem>up</stem> <staff>1</staff> <beam number="1">begin</beam> <notations> <slur…
35	3e5e3cb3b417a1cf1baa10af4927b709_3级A项小练习曲 Op.68 No.14_1	39	Does measure 39 have stable playing speed?	TRUE	Stability	mm/3e5e3cb3b417a1cf1baa10af4927b709_3级A项小练习曲 Op.68 No.14_1.mp3	<measure number="39" width="166.16"><note print-object="no"> <rest /> <duration>3</duration> <voice>1</voice> <type>quarter</type> <dot /> <staff>1</staff> </note> <note default-x="87.01" default-y="-25.00"> <pitch> <step>A</step> <octave>4</octave> </pitch> <duration>1</duration> <voice>1</voice> <type>eighth</type> <stem>up</stem> <staff>1</staff> <beam number="1">begin</beam> <notations> <slur…
36	3e5e3cb3b417a1cf1baa10af4927b709_3级A项小练习曲 Op.68 No.14_1	39	Does measure 39 state that note timing matches the score?	FALSE	Rhythm	mm/3e5e3cb3b417a1cf1baa10af4927b709_3级A项小练习曲 Op.68 No.14_1.mp3	<measure number="39" width="166.16"><note print-object="no"> <rest /> <duration>3</duration> <voice>1</voice> <type>quarter</type> <dot /> <staff>1</staff> </note> <note default-x="87.01" default-y="-25.00"> <pitch> <step>A</step> <octave>4</octave> </pitch> <duration>1</duration> <voice>1</voice> <type>eighth</type> <stem>up</stem> <staff>1</staff> <beam number="1">begin</beam> <notations> <slur…
37	3e5e3cb3b417a1cf1baa10af4927b709_3级A项小练习曲 Op.68 No.14_1	13	Measure 13 has no missing notes.	TRUE	Completeness	mm/3e5e3cb3b417a1cf1baa10af4927b709_3级A项小练习曲 Op.68 No.14_1.mp3	<measure number="13" width="173.76"><note print-object="no"> <rest /> <duration>3</duration> <voice>1</voice> <type>quarter</type> <dot /> <staff>1</staff> </note> <note default-x="91.58" default-y="-25.00"> <pitch> <step>A</step> <octave>4</octave> </pitch> <duration>1</duration> <voice>1</voice> <type>eighth</type> <stem>up</stem> <staff>1</staff> <beam number="1">begin</beam> </note> <note def…
38	3e5e3cb3b417a1cf1baa10af4927b709_3级A项小练习曲 Op.68 No.14_1	13	Key accuracy in measure 13 met the desired standard described in its evaluation.	TRUE	Key Accuracy	mm/3e5e3cb3b417a1cf1baa10af4927b709_3级A项小练习曲 Op.68 No.14_1.mp3	<measure number="13" width="173.76"><note print-object="no"> <rest /> <duration>3</duration> <voice>1</voice> <type>quarter</type> <dot /> <staff>1</staff> </note> <note default-x="91.58" default-y="-25.00"> <pitch> <step>A</step> <octave>4</octave> </pitch> <duration>1</duration> <voice>1</voice> <type>eighth</type> <stem>up</stem> <staff>1</staff> <beam number="1">begin</beam> </note> <note def…
39	3e5e3cb3b417a1cf1baa10af4927b709_3级A项小练习曲 Op.68 No.14_1	13	Measure 13's performance was rhythmically stable.	FALSE	Stability	mm/3e5e3cb3b417a1cf1baa10af4927b709_3级A项小练习曲 Op.68 No.14_1.mp3	<measure number="13" width="173.76"><note print-object="no"> <rest /> <duration>3</duration> <voice>1</voice> <type>quarter</type> <dot /> <staff>1</staff> </note> <note default-x="91.58" default-y="-25.00"> <pitch> <step>A</step> <octave>4</octave> </pitch> <duration>1</duration> <voice>1</voice> <type>eighth</type> <stem>up</stem> <staff>1</staff> <beam number="1">begin</beam> </note> <note def…
40	3e5e3cb3b417a1cf1baa10af4927b709_3级A项小练习曲 Op.68 No.14_1	13	Measure 13's performance speed was significantly slower than intended.	TRUE	Rhythm	mm/3e5e3cb3b417a1cf1baa10af4927b709_3级A项小练习曲 Op.68 No.14_1.mp3	<measure number="13" width="173.76"><note print-object="no"> <rest /> <duration>3</duration> <voice>1</voice> <type>quarter</type> <dot /> <staff>1</staff> </note> <note default-x="91.58" default-y="-25.00"> <pitch> <step>A</step> <octave>4</octave> </pitch> <duration>1</duration> <voice>1</voice> <type>eighth</type> <stem>up</stem> <staff>1</staff> <beam number="1">begin</beam> </note> <note def…
41	3e5e3cb3b417a1cf1baa10af4927b709_3级A项小练习曲 Op.68 No.14_2	46	Measure 46 has no missing notes.	TRUE	Completeness	mm/3e5e3cb3b417a1cf1baa10af4927b709_3级A项小练习曲 Op.68 No.14_2.mp3	<measure number="46" width="259.23"><print new-system="yes"> <system-layout> <system-margins> <left-margin>14.94</left-margin> <right-margin>0.00</right-margin> </system-margins> <system-distance>85.00</system-distance> </system-layout> <staff-layout number="2"> <staff-distance>65.00</staff-distance> </staff-layout> </print> <note print-object="no"> <rest /> <duration>3</duration> <voice>1</voice…
42	3e5e3cb3b417a1cf1baa10af4927b709_3级A项小练习曲 Op.68 No.14_2	46	Is the note in Section 46 accurate?	TRUE	Key Accuracy	mm/3e5e3cb3b417a1cf1baa10af4927b709_3级A项小练习曲 Op.68 No.14_2.mp3	<measure number="46" width="259.23"><print new-system="yes"> <system-layout> <system-margins> <left-margin>14.94</left-margin> <right-margin>0.00</right-margin> </system-margins> <system-distance>85.00</system-distance> </system-layout> <staff-layout number="2"> <staff-distance>65.00</staff-distance> </staff-layout> </print> <note print-object="no"> <rest /> <duration>3</duration> <voice>1</voice…
43	3e5e3cb3b417a1cf1baa10af4927b709_3级A项小练习曲 Op.68 No.14_2	46	Measure 46 has unstable playing speed.	FALSE	Stability	mm/3e5e3cb3b417a1cf1baa10af4927b709_3级A项小练习曲 Op.68 No.14_2.mp3	<measure number="46" width="259.23"><print new-system="yes"> <system-layout> <system-margins> <left-margin>14.94</left-margin> <right-margin>0.00</right-margin> </system-margins> <system-distance>85.00</system-distance> </system-layout> <staff-layout number="2"> <staff-distance>65.00</staff-distance> </staff-layout> </print> <note print-object="no"> <rest /> <duration>3</duration> <voice>1</voice…
44	3e5e3cb3b417a1cf1baa10af4927b709_3级A项小练习曲 Op.68 No.14_2	46	Measure 46's speed is in line with the standard.	TRUE	Rhythm	mm/3e5e3cb3b417a1cf1baa10af4927b709_3级A项小练习曲 Op.68 No.14_2.mp3	<measure number="46" width="259.23"><print new-system="yes"> <system-layout> <system-margins> <left-margin>14.94</left-margin> <right-margin>0.00</right-margin> </system-margins> <system-distance>85.00</system-distance> </system-layout> <staff-layout number="2"> <staff-distance>65.00</staff-distance> </staff-layout> </print> <note print-object="no"> <rest /> <duration>3</duration> <voice>1</voice…
45	3e5e3cb3b417a1cf1baa10af4927b709_3级A项小练习曲 Op.68 No.14_2	7	Measure 7 has no missing or extra notes.	TRUE	Completeness	mm/3e5e3cb3b417a1cf1baa10af4927b709_3级A项小练习曲 Op.68 No.14_2.mp3	<measure number="7" width="166.32"><note default-x="16.50" default-y="-50.00"> <pitch> <step>C</step> <octave>4</octave> </pitch> <duration>1</duration> <voice>1</voice> <type>eighth</type> <stem>up</stem> <staff>1</staff> <beam number="1">begin</beam> <notations> <slur type="start" placement="above" number="1" /> </notations> </note> <note default-x="40.50" default-y="-40.00"> <pitch> <step>E</s…
46	3e5e3cb3b417a1cf1baa10af4927b709_3级A项小练习曲 Op.68 No.14_2	7	Measure 7's note accuracy matches its evaluation result.	TRUE	Key Accuracy	mm/3e5e3cb3b417a1cf1baa10af4927b709_3级A项小练习曲 Op.68 No.14_2.mp3	<measure number="7" width="166.32"><note default-x="16.50" default-y="-50.00"> <pitch> <step>C</step> <octave>4</octave> </pitch> <duration>1</duration> <voice>1</voice> <type>eighth</type> <stem>up</stem> <staff>1</staff> <beam number="1">begin</beam> <notations> <slur type="start" placement="above" number="1" /> </notations> </note> <note default-x="40.50" default-y="-40.00"> <pitch> <step>E</s…
47	3e5e3cb3b417a1cf1baa10af4927b709_3级A项小练习曲 Op.68 No.14_2	7	Measure 7's stability evaluation exceeds its reference value.	FALSE	Stability	mm/3e5e3cb3b417a1cf1baa10af4927b709_3级A项小练习曲 Op.68 No.14_2.mp3	<measure number="7" width="166.32"><note default-x="16.50" default-y="-50.00"> <pitch> <step>C</step> <octave>4</octave> </pitch> <duration>1</duration> <voice>1</voice> <type>eighth</type> <stem>up</stem> <staff>1</staff> <beam number="1">begin</beam> <notations> <slur type="start" placement="above" number="1" /> </notations> </note> <note default-x="40.50" default-y="-40.00"> <pitch> <step>E</s…
48	3e5e3cb3b417a1cf1baa10af4927b709_3级A项小练习曲 Op.68 No.14_2	7	Measure 7's speed matches its tempo synchronization evaluation.	TRUE	Rhythm	mm/3e5e3cb3b417a1cf1baa10af4927b709_3级A项小练习曲 Op.68 No.14_2.mp3	<measure number="7" width="166.32"><note default-x="16.50" default-y="-50.00"> <pitch> <step>C</step> <octave>4</octave> </pitch> <duration>1</duration> <voice>1</voice> <type>eighth</type> <stem>up</stem> <staff>1</staff> <beam number="1">begin</beam> <notations> <slur type="start" placement="above" number="1" /> </notations> </note> <note default-x="40.50" default-y="-40.00"> <pitch> <step>E</s…
49	3e5e3cb3b417a1cf1baa10af4927b709_3级A项小练习曲 Op.68 No.14_2	9	Measure 9 has no missing notes.	TRUE	Completeness	mm/3e5e3cb3b417a1cf1baa10af4927b709_3级A项小练习曲 Op.68 No.14_2.mp3	<measure number="9" width="170.87"><note print-object="no"> <rest /> <duration>3</duration> <voice>1</voice> <type>quarter</type> <dot /> <staff>1</staff> </note> <note default-x="89.84" default-y="-25.00"> <pitch> <step>A</step> <octave>4</octave> </pitch> <duration>1</duration> <voice>1</voice> <type>eighth</type> <stem>up</stem> <staff>1</staff> <beam number="1">begin</beam> <notations> <techn…
50	3e5e3cb3b417a1cf1baa10af4927b709_3级A项小练习曲 Op.68 No.14_2	9	Is the note in Section 9 accurate?	TRUE	Key Accuracy	mm/3e5e3cb3b417a1cf1baa10af4927b709_3级A项小练习曲 Op.68 No.14_2.mp3	<measure number="9" width="170.87"><note print-object="no"> <rest /> <duration>3</duration> <voice>1</voice> <type>quarter</type> <dot /> <staff>1</staff> </note> <note default-x="89.84" default-y="-25.00"> <pitch> <step>A</step> <octave>4</octave> </pitch> <duration>1</duration> <voice>1</voice> <type>eighth</type> <stem>up</stem> <staff>1</staff> <beam number="1">begin</beam> <notations> <techn…
