# Supplementary material
Source: ML conference proceedings conference paper supplement (https://openreview.net/forum?id=kDqH5KmRWR)
Supplement: supplementary_material [file question_demo.xlsx]

## Sheet: Sheet1
Question	A	B	C	D	Correct answer	Category
When a diminished fifth is inverted, what interval is formed?	Augmented fourth	Perfect fourth	Diminished fourth	Minor sixth	A	Pitch and Intervals
How many half steps are present in an augmented sixth interval?	8	9	10	11	C	Pitch and Intervals
What is the interval between C and E♯ when played in ascending order, and how is it classified?	Augmented third	Perfect fourth	Diminished fourth	Major third	A	Pitch and Intervals
In a major scale, what is the interval between the third and seventh scale degrees?	Perfect fifth	Augmented fifth	Major sixth	Minor sixth	A	Pitch and Intervals
In the key of C major, what is the interval between F and B?	Augmented fourth	Diminished fifth	Perfect fourth	Major third	A	Pitch and Intervals
In the key of E major, what is the interval between E and C natural?	Major sixth	Minor sixth	Diminished sixth	Augmented fifth	B	Pitch and Intervals
When a major sixth interval is inverted, what interval is formed?	Minor third	Major third	Perfect fourth	Diminished fifth	A	Pitch and Intervals
What simple interval is equivalent to a major 10th?	Major third	Minor sixth	Perfect fourth	Augmented fifth	A	Pitch and Intervals
What is the inversion of an augmented fourth interval?	Diminished fifth	Perfect fifth	Minor fifth	Augmented fifth	A	Pitch and Intervals
Which interval consists of six half steps (semitones)?	Perfect fourth	Tritone	Perfect fifth	Minor sixth	B	Pitch and Intervals
Which pair of intervals are enharmonic equivalents?	Minor third (E to G) and Major third (F to A)	Minor third (B to D) and Minor third (C to E♭)	Diminished fifth (C♯ to G) and Augmented fourth (D♯ to A)	Major third (F to A) and Major third (G to B)	C	Pitch and Intervals
When inverted, a diminished fifth becomes which interval?	Perfect fourth	Augmented fourth	Diminished fourth	Augmented fifth	B	Pitch and Intervals
Which pair of intervals are enharmonic equivalents?	Major third and minor third	Perfect fourth and augmented third	Diminished fifth and perfect fifth	Augmented second and minor third	D	Pitch and Intervals
Which of the following intervals is an augmented third?	C to E	C to E♯	C to F	C to G♭	B	Pitch and Intervals
Which interval is enharmonically equivalent to a diminished fifth?	Augmented fourth	Major third	Minor sixth	Perfect fifth	A	Pitch and Intervals
When a major seventh interval is inverted, what interval is formed?	minor second	major second	minor seventh	perfect fourth	A	Pitch and Intervals
When a major third interval (C to E) is inverted, what interval does it become?	Perfect fourth	Minor sixth	Augmented fifth	Major sixth	B	Pitch and Intervals
What is the interval between D♭ and E natural?	Augmented second	Minor third	Major third	Diminished fourth	A	Pitch and Intervals
Which pair of intervals are enharmonically equivalent but have different interval qualities?	Major third and minor third	Perfect fourth and perfect fifth	Augmented fourth and diminished fifth	Major seventh and minor sixth	C	Pitch and Intervals
Which pair of intervals consists of enharmonically equivalent intervals that have different interval qualities?	Major third and minor third	Perfect fourth and perfect fifth	Augmented fourth and perfect fifth	Diminished fifth and augmented fourth	D	Pitch and Intervals
Which of the following determines the quality (e.g., major, minor, perfect) of an interval?	The letter names of the two notes	The number of semitones between the two notes	The key signature in which the interval is written	The scale degree of the lower note	B	Pitch and Intervals
Which pair of intervals consists of enharmonically equivalent intervals (i.e., they span the same number of semitones but have different names)?	Augmented fourth and diminished fifth	Major third and perfect fourth	Minor seventh and major sixth	Perfect fifth and augmented fourth	A	Pitch and Intervals
Which interval is enharmonically equivalent to a diminished fifth?	Augmented fourth	Major third	Minor sixth	Perfect fourth	A	Pitch and Intervals
When an augmented fourth is inverted, what interval is produced?	Perfect fifth	Diminished fifth	Augmented fifth	Diminished fourth	B	Pitch and Intervals
When inverted, a major seventh interval becomes which of the following intervals?	minor second	major second	perfect fourth	augmented prime	A	Pitch and Intervals
When a minor sixth interval is inverted, what interval is produced?	Major third	Minor third	Perfect fourth	Augmented fifth	A	Pitch and Intervals
What is the interval between F and B double flat?	Diminished fourth	Major third	Perfect fourth	Augmented third	A	Pitch and Intervals
What is the interval between C and E#?	Augmented second	Major third	Diminished fourth	Augmented third	D	Pitch and Intervals
What is the interval between E♭ and G♯ when played in ascending order?	Augmented third	Diminished fourth	Perfect fourth	Major third	A	Pitch and Intervals
When a major 7th interval is inverted, what interval is formed?	minor 2nd	major 2nd	perfect 4th	diminished 5th	A	Pitch and Intervals
When inverted, a major sixth becomes which interval?	minor third	major third	perfect fourth	diminished fifth	A	Pitch and Intervals
What is the quality and size of the interval between C and E#?	Major third	Augmented third	Perfect fourth	Diminished fourth	B	Pitch and Intervals
Which interval is enharmonically equivalent to a perfect fourth?	Major third	Augmented third	Diminished fifth	Perfect fifth	B	Pitch and Intervals
In the key of G major, what is the interval between C and F#?	Perfect fourth	Augmented fourth	Diminished fifth	Major fifth	B	Pitch and Intervals
What is the interval between E and B♭?	Perfect fourth	Augmented fourth	Diminished fifth	Minor sixth	C	Pitch and Intervals
What is the interval between C and F# in a C major scale context, considering both letter distance and semitone count?	Perfect fourth	Augmented fourth	Diminished fifth	Perfect fifth	B	Pitch and Intervals
Which interval is the enharmonic equivalent of a diminished fifth?	Augmented fourth	Perfect fourth	Minor sixth	Major third	A	Pitch and Intervals
What is the interval between F and B?	Perfect fourth	Augmented fourth	Diminished fifth	Perfect fifth	B	Pitch and Intervals
Which interval is enharmonically equivalent to an augmented fourth?	Diminished fifth	Major third	Perfect fifth	Minor sixth	A	Pitch and Intervals
Which interval is the enharmonic equivalent of a diminished fifth?	Augmented fourth	Perfect fourth	Minor sixth	Major third	A	Pitch and Intervals
What is the interval between C and E#?	Augmented third	Diminished fourth	Perfect fourth	Major third	A	Pitch and Intervals
How many semitones are in a minor sixth interval?	6	7	8	9	C	Pitch and Intervals
What is the interval between C and E#?	Augmented third	Perfect fourth	Diminished fifth	Major third	A	Pitch and Intervals
When inverted, a major seventh interval becomes which of the following?	minor second	perfect unison	augmented prime	major seventh	A	Pitch and Intervals
What is the interval between C and F# when played in succession, and how is it classified?	Perfect fourth	Augmented fourth	Perfect fifth	Diminished fifth	B	Pitch and Intervals
What is the interval between C and E#?	Augmented third	Perfect fourth	Diminished fourth	Major third	A	Pitch and Intervals
Which interval consists of a major 3rd plus an octave and is classified as a compound interval?	Major 10th	Perfect 5th	Minor 7th	Augmented 4th	A	Pitch and Intervals
When a perfect fourth is inverted, what interval is formed?	Perfect fifth	Diminished fifth	Augmented fourth	Major third	A	Pitch and Intervals
Which of the following intervals is classified as augmented when constructed from C natural?	C to E♭	C to G	C to F♯	C to A	C	Pitch and Intervals
If the interval from C to F♯ is an augmented fourth, which of the following is its enharmonic equivalent?	C to G (perfect fifth)	C to G♭ (diminished fifth)	C to E (major third)	C to F (perfect fourth)	B	Pitch and Intervals
What interval is formed when a tritone (augmented fourth/diminished fifth) is inverted?	Perfect fourth	Minor sixth	Tritone	Major third	C	Pitch and Intervals
What is the interval between F and A#?	Augmented third	Perfect fourth	Diminished fourth	Major third	A	Pitch and Intervals
What is the interval formed by the notes F and A# when inverted?	Diminished sixth	Perfect fifth	Augmented fourth	Minor sixth	A	Pitch and Intervals
Which of the following intervals is enharmonically equivalent to an augmented fourth?	Diminished fifth	Perfect fourth	Major third	Minor sixth	A	Pitch and Intervals
When a major sixth interval is inverted, what interval is formed?	minor second	major third	minor third	perfect fourth	C	Pitch and Intervals
When a perfect fourth is inverted, what interval is formed?	Perfect fifth	Augmented fourth	Diminished fifth	Major third	A	Pitch and Intervals
In the alto clef, a note is placed on the fourth space, and in the bass clef, a note is placed on the second space. What is the interval between these two notes?	Perfect Fourth	Major Sixth	Perfect Fifth	Augmented Fourth	C	Pitch and Intervals
Which interval becomes an augmented sixth when the upper note is raised by a half-step?	Major sixth	Minor sixth	Perfect fifth	Diminished sixth	A	Pitch and Intervals
When a major third is inverted, which interval is formed?	Minor third	Perfect fourth	Minor sixth	Major sixth	C	Pitch and Intervals
Which interval consists of six half-steps?	Perfect fourth	Perfect fifth	Augmented fourth	Minor sixth	C	Pitch and Intervals
In a compound triple meter, how many beats are there per measure, and what is the subdivision of each beat?	3 beats, subdivided into two eighth notes	3 beats, subdivided into three eighth notes	4 beats, subdivided into three eighth notes	2 beats, subdivided into three eighth notes	B	Rhythm and Meter
In a piece notated in 5/4 time, which grouping of quarter notes represents the most common asymmetrical division of the measure?	3 + 2	2 + 3	4 + 1	1 + 2 + 2	A	Rhythm and Meter
In a piece written in 7/8 time, which of the following beat divisions is most commonly associated with an "asymmetrical" feel?	3 + 2 + 2	4 + 3	2 + 2 + 3	7 equal beats	C	Rhythm and Meter
In a piece notated in 6/8 time, how are the eighth notes typically grouped within a single measure?	Two groups of three	Three groups of two	Four groups of two	Six groups of one	A	Rhythm and Meter
In a piece notated in 6/8 time, which of the following rhythmic patterns correctly groups eighth notes to reflect the compound meter?	Two groups of three eighth notes	Three groups of two eighth notes	Four groups of one eighth note followed by a quarter rest	One group of six eighth notes	A	Rhythm and Meter
In a compound duple meter, how are the beats typically subdivided, and what is the correct time signature example?	Beats subdivided into two eighth notes; 2/4	Beats subdivided into three eighth notes; 6/8	Beats subdivided into four sixteenth notes; 4/4	Beats subdivided into two dotted eighth notes; 3/4	B	Rhythm and Meter
Which of the following best describes the meter of a piece in 9/8 time signature?	Simple triple (three beats per measure, each divided into two)	Compound duple (two beats per measure, each divided into three)	Compound triple (three beats per measure, each divided into three)	Simple quadruple (four beats per measure, each divided into two)	C	Rhythm and Meter
In a 4/4 time signature, which of the following rhythmic figures demonstrates syncopation by tying a note from a weak part of the beat to a strong beat?	A quarter note on beat 1 tied to a quarter note on beat 2	A quarter note on beat 3 tied to an eighth note on the "and" of beat 3	An eighth note on the "and" of beat 2 tied to a quarter note on beat 3	A half note starting on beat 4 tied to a quarter note on beat 1 of the next measure	C	Rhythm and Meter
In 6/8 time, which combination of notes completes one full measure?	Dotted quarter note, eighth note, quarter note	Half note, eighth note	Quarter note, quarter note, dotted quarter note	Eighth note, eighth note, eighth note, dotted half note	A	Rhythm and Meter
In a meter where each beat is subdivided into three equal parts and the dotted quarter note receives one beat, which type of meter is this?	Simple triple	Compound duple	Compound triple	Simple quadruple	B	Rhythm and Meter
In a piece of music, if the eighth note is the beat unit and the time signature is 6/8, which term best describes the subdivision of each main beat?	Duple (two equal parts)	Triple (three equal parts)	Quadruple (four equal parts)	Quintuple (five equal parts)	B	Rhythm and Meter
In 3/4 time, which rhythmic pattern creates a hemiola effect?	Three quarter notes	Two dotted quarter notes	Six eighth notes grouped in threes	A quarter note followed by a half note	B	Rhythm and Meter
In a 6/8 time signature, how are eighth notes typically grouped within a single measure?	Two groups of three eighth notes each	Three groups of two eighth notes each	Four groups of three eighth notes each	Six individual eighth notes with no grouping	A	Rhythm and Meter
Which of the following terms describes a rhythmic pattern where the accents fall on typically unaccented beats or subdivisions?	Syncopation	Polyrhythm	Hemiola	Cross rhythm	A	Rhythm and Meter
Which term describes the simultaneous use of two different meters, such as 3/4 and 6/8, in different layers of a musical composition?	Polyrhythm	Polymeter	Syncopation	Compound meter	B	Rhythm and Meter
Which term best describes a meter that subdivides into uneven groupings, such as 2+3 in a 5/4 time signature?	Simple triple	Compound duple	Complex/Asymmetrical	Mixed meter	C	Rhythm and Meter
In a 9/8 time signature, which of the following rhythmic groupings correctly represents the compound triple meter?	Three groups of two eighth notes followed by a dotted quarter note	Three groups of three eighth notes	Two groups of four eighth notes followed by a single eighth note	Four groups of two eighth notes with an eighth rest	B	Rhythm and Meter
In the context of modulating from C major to G major, which pivot chord would most effectively facilitate a smooth transition by functioning diatonically in both keys?	C major (I)	E minor (iii)	A minor (vi)	D major (V)	C	Harmony and Tonality
In a major key, which harmonic technique involves borrowing a chord from the parallel minor to create a sudden expressive shift in tonality?	Secondary dominant	Modal mixture	Relative key modulation	Neapolitan chord	B	Harmony and Tonality
In the key of C major, which chord functions as the secondary dominant to the dominant (V) chord?	F major (IV)	E minor (iii)	G major (V)	D major (V/V)	D	Harmony and Tonality
In tonal harmony, what is the primary function of a secondary dominant chord?	To modulate to a distant key	To create a temporary tonicization of a non-tonic chord	To add chromatic color without changing key	To establish the parallel minor mode	B	Harmony and Tonality
In the key of F major, which diatonic triad does a G7 chord typically function as a secondary dominant to?	B♭ major (IV)	C major (V)	D minor (vi)	G minor (ii)	B	Harmony and Tonality
In which cadence is a Picardy third most commonly used?	Perfect cadence in a minor key	Plagal cadence in a major key	Deceptive cadence in a minor key	Half cadence in a major key	A	Harmony and Tonality
In the context of harmonic progressions, which cadence is traditionally associated with the "Amen" closing in hymns and often described as moving from subdominant to tonic chords?	Perfect cadence	Plagal cadence	Imperfect cadence	Deceptive cadence	B	Harmony and Tonality
In a tonal context, which harmonic device is primarily responsible for creating a sense of tension that resolves to the tonic by using a dominant seventh chord built on the fifth scale degree?	Plagal cadence	Secondary dominant	Neapolitan chord	Deceptive cadence	B	Harmony and Tonality
In a common-practice period piece in C major, which chord typically functions as a secondary dominant to the dominant (V) chord?	D7	F major	A minor	E minor	A	Harmony and Tonality
In a minor key, which cadence is characterized by the progression iv⁶ to V, often creating a half-cadence effect with a distinctive semitonal motion in the bass?	Phrygian cadence	Plagal cadence	Perfect cadence	Deceptive cadence	A	Harmony and Tonality
In the Dorian mode, what is the quality of the triad built on the fourth scale degree?	Major	Minor	Diminished	Augmented	A	Harmony and Tonality
In the key of A major, which chord serves as the secondary dominant to the IV chord (D major)?	A7	E7	D7	B7	A	Harmony and Tonality
In a major key, which chord progression typically represents a deceptive cadence?	V to IV	V to vi	V to I	V to V7	B	Harmony and Tonality
In the key of D major, which chord functions as the secondary dominant to the submediant (vi) chord?	B major	F#7	C# diminished	A7	B	Harmony and Tonality
In the key of C major, which chord progression represents a deceptive cadence?	G major to C major	G major to F major	G major to A minor	G major to E minor	C	Harmony and Tonality
Which term describes the technique of borrowing chords from a parallel mode (e.g., using a chord from C minor in the key of C major) to create harmonic color and tension?	Secondary dominant	Neapolitan chord	Modal interchange	Enharmonic modulation	C	Harmony and Tonality
In the context of harmonic progression, which of the following chord movements best exemplifies a deceptive cadence?	V to I	IV to I	V to vi	I to V	C	Harmony and Tonality
In a diatonic context, which type of modulation uses a sustained or repeated pitch common to both the original key and the target key as a pivot?	Chromatic modulation	Enharmonic modulation	Common-tone modulation	Sequential modulation	C	Harmony and Tonality
In the context of functional harmony, which term describes a chord that temporarily tonicizes a non-tonic scale degree by acting as its dominant?	Neapolitan chord	Modal mixture	Secondary dominant	Deceptive cadence	C	Harmony and Tonality
In a modulation from C major to G major, which pivot chord could be used to smoothly transition between the two keys?	C major (I)	E minor (iii)	G major (V)	D minor (ii)	B	Harmony and Tonality
In a major key, which term describes the use of a chord borrowed from the parallel minor to create tonal contrast?	Secondary dominant	Modal mixture	Neapolitan chord	Augmented sixth	B	Harmony and Tonality
In classical harmony, which chord is commonly used as a pre-dominant substitute in minor keys and is built on the flattened second scale degree?	Neapolitan sixth	German augmented sixth	Dominant seventh	Tonic parallel	A	Harmony and Tonality
In a major key, which chord progression exemplifies a secondary dominant leading to the supertonic?	V/V → ii	vii°7 → I	IV → V	vi → IV	A	Harmony and Tonality
In a minor key, which type of cadence typically involves raising the seventh scale degree to create a major dominant chord resolving to the tonic?	Plagal cadence	Deceptive cadence	Perfect authentic cadence	Half cadence	C	Harmony and Tonality
When modulating from C major to G major using a pivot chord, which chord is diatonic to both keys and can effectively function as the pivot?	G major	F major	B diminished	D major	A	Harmony and Tonality
In the context of tonal harmony, which chord is traditionally considered the Neapolitan sixth in the key of C minor?	D diminished triad	F minor triad	Db major triad in first inversion	Bb major triad	C	Harmony and Tonality
In a major key, which of the following chords is most commonly borrowed from the parallel minor to create modal mixture?	V	ii°	iv	I	C	Harmony and Tonality
In a piece that begins in E major and modulates to B major via a secondary dominant, which chord most likely facilitates the modulation?	F#7	C#7	G#7	A#7	A	Harmony and Tonality
When modulating from C major to G major, which chord can function as a pivot chord, as it is diatonic to both keys?	C major	G major	F major	E minor	A	Harmony and Tonality
In tonal harmony, which of the following best describes the function of a secondary dominant chord?	To modulate permanently to a distant key	To establish a temporary tonal center other than the home key	To create non-functional harmonic progressions	To resolve dissonance through atonal passages	B	Harmony and Tonality
Which harmonic device is typically used to create a sudden shift from a minor key to its parallel major by altering the third of the tonic chord?	Neapolitan chord	Picardy third	Secondary dominant	Modal mixture	B	Harmony and Tonality
In tonal harmony, which cadence is traditionally referred to as the "Amen" cadence and is characterized by a subdominant-to-tonic (IV–I) chord progression?	Perfect cadence (V–I)	Plagal cadence (IV–I)	Imperfect cadence (I–V)	Deceptive cadence (V–vi)	B	Harmony and Tonality
Which type of cadence is most frequently used to strongly establish the tonality of a piece at its conclusion?	Perfect authentic cadence (V-I)	Plagal cadence (IV-I)	Deceptive cadence (V-vi)	Half cadence (ending on V)	A	Harmony and Tonality
In a minor key, which cadence features a major tonic chord to create a sense of unexpected brightness?	Plagal cadence	Interrupted cadence	Perfect cadence with a Picardy third	Phrygian cadence	C	Harmony and Tonality
In a minor key composition, which cadential device involves raising the third of the tonic chord to create a major triad at the final resolution?	Plagal cadence	Deceptive cadence	Picardy third	Neapolitan chord	C	Harmony and Tonality
When modulating from C major to G major using a pivot chord, which chord is most likely to serve as the pivot?	C major (I)	G major (V)	F major (IV)	E minor (iii)	A	Harmony and Tonality
In the context of functional harmony, which term describes a dominant chord that temporarily tonicizes a scale degree other than the tonic, creating a brief shift in tonal center?	Secondary dominant	Neapolitan chord	Augmented sixth chord	Modal mixture	A	Harmony and Tonality
In a composition in D major, the chord progression C♯7 - F♯m is used. Which key is temporarily tonicized here?	D major	F♯ minor	A major	B minor	B	Harmony and Tonality
In a major key, which chord most commonly precedes the dominant (V) chord to create a strong authentic cadence?	Subdominant (IV)	Supertonic (ii)	Mediant (iii)	Submediant (vi)	B	Harmony and Tonality
In a major key, which chord most commonly follows the dominant (V) chord in a deceptive cadence?	IV	vi	I	iii	B	Harmony and Tonality
In a major key, which chord progression typically represents a deceptive cadence?	V to I	IV to I	V to vi	vii° to I	C	Harmony and Tonality
In a minor key, which chord is typically used as the dominant to strengthen an authentic cadence?	minor v	major V	diminished vii°	minor iv	B	Harmony and Tonality
In the context of modal mixture, which chord would most likely be borrowed from the parallel minor key in G major?	D major (V)	E minor (vi)	C minor (iv)	F# diminished (vii°)	C	Harmony and Tonality
Which chord is most commonly used as a pivot chord to modulate from a major key to its relative minor?	IV (subdominant)	V (dominant)	vi (submediant)	iii (mediant)	C	Harmony and Tonality
In the context of C major, which of the following chords functions as a secondary dominant?	D7	F	Em	C	A	Harmony and Tonality
In the context of melody structure, which term describes a phrase that ends on the dominant harmony, creating unresolved tension and leading naturally to a subsequent resolving phrase?	Antecedent phrase	Consequent phrase	Periodic structure	Cadential extension	A	Melody and Melody Structure
Which term describes the repetition of a melodic motif at successively higher or lower pitch levels?	A short, recurring rhythmic pattern	A complete musical thought ending with a cadence	Repetition of a motif at different pitch levels	The concluding part of a melodic line	C	Melody and Melody Structure
In the context of melodic structure, which term describes a short, recurring melodic idea that maintains its identity while undergoing variation throughout a composition?	Cadence	Phrase	Motif	Sequence	C	Melody and Melody Structure
In the context of melody structure, which term refers to a two-part framework where the first phrase creates tension by ending on a harmonically unstable note, and the second phrase resolves it by concluding on a stable tonic?	Periodic Structure	Rondo Form	Motivic Development	Counterpoint	A	Melody and Melody Structure
Which of the following terms describes a short, recurring melodic or rhythmic idea that serves as a foundational building block in a melody?	Phrase	Cadence	Motif	Interval	C	Melody and Melody Structure
Which of the following melodic structures is primarily characterized by conjunct motion?	A melody featuring leaps of a sixth followed by a descending third	A melody with repeated notes and occasional minor thirds	A melody built from ascending and descending half-steps	A melody using octave jumps and chromatic runs	C	Melody and Melody Structure
Which term describes a melodic pattern that is immediately repeated at a higher or lower pitch level?	Inversion	Retrograde	Sequence	Augmentation	C	Melody and Melody Structure
In melody structure, which term describes the highest point of pitch intensity, often serving as the emotional climax of the melodic line?	Cadential point	Tonic	Apex	Conjunct motion	C	Melody and Melody Structure
In the context of melodic structure, which term refers to a short, recurring musical idea that is developed throughout a composition?	Cadence	Motif	Phrase	Interval	B	Melody and Melody Structure
Which term refers to a short, recurring melodic fragment that serves as a foundational element for development in a composition?	Motif	Theme	Phrase	Cadence	A	Melody and Melody Structure
In the context of melody structure, which element refers to a short, recurring musical idea that serves as a foundational building block for developing a melody?	Cadence	Motif	Interval	Sequence	B	Melody and Melody Structure
Which term refers to the smallest structural unit of a melody, often consisting of a short, distinctive rhythmic or intervallic pattern that is developed throughout a composition?	Phrase	Period	Cadence	Motive	D	Melody and Melody Structure
In melody structure, what is the term for a pair of phrases where the first (antecedent) ends with an unresolved or weak cadence, and the second (consequent) provides closure with a strong cadence?	Period	Sequence	Motif	Coda	A	Melody and Melody Structure
In the context of melody structure, which term describes a melodic phrase that ends on the dominant, creating a sense of unresolved tension and typically leading to a subsequent phrase for closure?	Antecedent	Consequent	Period	Cadential	A	Melody and Melody Structure
Which term describes a short, recurring melodic fragment that serves as a foundational building block for developing a melody?	Phrase	Cadence	Motif	Theme	C	Melody and Melody Structure
In melody structure, which term describes a small, recurring melodic fragment that serves as a foundational building block for developing a larger melodic line?	Cadence	Phrase	Motif	Interval	C	Melody and Melody Structure
Which term refers to a short, recurring melodic idea that is developed and elaborated throughout a composition?	Phrase	Cadence	Motif	Theme	C	Melody and Melody Structure
In melody structure, what is the primary distinction between an antecedent phrase and a consequent phrase?	Antecedent phrases modulate to a new key, while consequent phrases return to the original key.	Antecedent phrases end with a weak cadence, creating tension, while consequent phrases resolve with a strong cadence.	Antecedent phrases use disjunct motion, while consequent phrases use conjunct motion.	Antecedent phrases are dynamically louder, while consequent phrases are softer.	B	Melody and Melody Structure
In the context of melody structure, which term refers to the opening phrase of a melody that often ends with a weak cadence, setting up tension resolved by a subsequent phrase?	Consequent phrase	Motif	Antecedent phrase	Cadential extension	C	Melody and Melody Structure
In the context of melody structure, which term describes a two-phrase unit in which the first phrase (antecedent) ends with a weak cadence, and the second phrase (consequent) provides resolution with a stronger cadence?	Period Structure	Binary Form	Motif Variation	Call and Response	A	Melody and Melody Structure
Which term describes a small, recurring melodic fragment that serves as a foundational building block for developing a melody or larger composition?	Motif	Phrase	Sequence	Cadence	A	Melody and Melody Structure
Which term describes a melody that primarily moves in small, connected intervals, creating a smooth and stepwise progression?	Disjunct	Conjunct	Angular	Triadic	B	Melody and Melody Structure
In a traditional period structure comprising antecedent and consequent phrases, which characteristic typically distinguishes the antecedent phrase?	Ends on the tonic note	Ends with a half cadence	Resolves the melodic tension	Contains the climactic peak of the melody	B	Melody and Melody Structure
Which compositional technique involves repeating a melodic motif at successively higher or lower pitch levels while maintaining the same intervallic structure within a key?	Inversion	Retrograde	Sequence	Imitation	C	Melody and Melody Structure
Which of the following is defined as a short, recurring rhythmic or melodic figure that serves as a foundational element in a musical composition?	Phrase	Sequence	Motif	Cadence	C	Melody and Melody Structure
Which of the following terms refers to a smaller, distinct melodic unit that often functions as a building block within a larger melodic structure?	Cadence	Contour	Phrase	Interval	C	Melody and Melody Structure
Which term describes a melody that primarily moves by leaps (larger intervals) rather than stepwise motion?	Conjunct	Disjunct	Intervallic	Scalar	B	Melody and Melody Structure
Which of the following terms refers to a short, recurring melodic fragment that serves as a foundational element in the structure of a melody?	Phrase	Cadence	Motif	Contour	C	Melody and Melody Structure
Which term describes the highest point in a melody's contour, typically serving as the emotional or structural peak of a phrase?	Climax	Cadence	Sequence	Motif	A	Melody and Melody Structure
In the context of melody structure, which type of melodic phrase typically ends with a half cadence, creating tension that is resolved in the subsequent phrase?	Antecedent	Consequent	Period	Coda	A	Melody and Melody Structure
Which term refers to the smallest, recognizable melodic or rhythmic unit that can be developed throughout a composition?	Phrase	Motif	Cadence	Interval	B	Melody and Melody Structure
In the context of melody structure, which term refers to a short, recurring musical idea that is developed and elaborated throughout a composition?	Motif	Phrase	Period	Sequence	A	Melody and Melody Structure
In the context of melody structure, which term describes a short, recurring musical idea that serves as a foundational element for developing a melody?	Cadence	Phrase	Motif	Interval	C	Melody and Melody Structure
In melodic structure, which term describes a phrase that ends with unresolved harmonic tension, typically leading to a consequent phrase for resolution?	Antecedent	Consequent	Cadential	Transitional	A	Melody and Melody Structure
In melodic structure, which term refers to an initial phrase that ends with unresolved harmonic tension, typically followed by a responding phrase that provides resolution?	Consequent phrase	Antecedent phrase	Period	Cadence	B	Melody and Melody Structure
In the context of melodic structure, which term refers to the repetition of a motif or short melodic idea at a different pitch level while maintaining its rhythmic and intervallic character?	Phrase	Sequence	Cadence	Interval	B	Melody and Melody Structure
In melody structure, which term describes a two-part melodic unit where the second phrase responds to or resolves the first, often creating a sense of balance and completion?	Period structure	Ternary form	Motivic development	Through-composed	A	Melody and Melody Structure
The E Phrygian mode shares the same notes as which major scale?	G major	C major	A major	E major	B	Scales and Modes
Which mode is identical to the major scale but features a raised fourth scale degree?	Mixolydian	Lydian	Phrygian	Dorian	B	Scales and Modes
Which mode, when starting on the same root as a major scale, features a major third and a minor seventh?	Ionian	Dorian	Mixolydian	Phrygian	C	Scales and Modes
Which of the following modes features a natural 6th and a minor 7th when compared to the natural minor scale?	Dorian	Phrygian	Aeolian	Mixolydian	A	Scales and Modes
Which of the following scales is characterized by a minor third and a major sixth interval above the tonic?	Dorian mode	Natural minor scale	Harmonic minor scale	Mixolydian mode	A	Scales and Modes
Which mode is characterized by a major third, a raised fourth (augmented fourth), and a major seventh relative to its root?	Lydian	Mixolydian	Dorian	Phrygian	A	Scales and Modes
Which of the following correctly orders modes derived from the C major scale from brightest to darkest in terms of their tonal character?	Ionian, Dorian, Phrygian, Lydian, Mixolydian, Aeolian, Locrian	Locrian, Phrygian, Aeolian, Dorian, Mixolydian, Ionian, Lydian	Lydian, Ionian, Mixolydian, Dorian, Aeolian, Phrygian, Locrian	Aeolian, Phrygian, Locrian, Dorian, Ionian, Mixolydian, Lydian	C	Scales and Modes
Which scale contains two augmented seconds within its interval structure?	Natural minor	Dorian mode	Major scale	Hungarian minor	D	Scales and Modes
When compared to a major scale with the same tonic, which two intervals are altered in the Dorian mode?	Minor third and perfect fourth	Minor third and minor seventh	Major sixth and minor seventh	Major second and major sixth	B	Scales and Modes
Which mode is derived from the harmonic minor scale and features a major third and an augmented second interval between its second and third degrees?	Dorian	Lydian	Mixolydian	Phrygian Dominant	D	Scales and Modes
Which mode starting on E consists of the notes E, F♯, G, A, B, C♯, D?	E Ionian	E Dorian	E Phrygian	E Mixolydian	B	Scales and Modes
Which mode is characterized by a raised fourth scale degree compared to the major scale (Ionian mode)?	Dorian	Phrygian	Lydian	Mixolydian	C	Scales and Modes
Which mode is derived from the major scale by raising the fourth scale degree by a half step?	Mixolydian	Dorian	Lydian	Aeolian	C	Scales and Modes
Which mode is characterized by the interval pattern Whole-Whole-Whole-Half-Whole-Whole-Half (W-W-W-H-W-W-H)?	Ionian	Dorian	Lydian	Mixolydian	C	Scales and Modes
Which of the following correctly lists the modes in order from brightest (most major-sounding) to darkest (most minor-sounding)?	Lydian, Mixolydian, Ionian, Dorian, Aeolian, Phrygian, Locrian	Lydian, Ionian, Mixolydian, Dorian, Aeolian, Phrygian, Locrian	Ionian, Lydian, Mixolydian, Dorian, Aeolian, Phrygian, Locrian	Lydian, Ionian, Dorian, Mixolydian, Aeolian, Phrygian, Locrian	B	Scales and Modes
The Dorian mode starting on D is derived from which major scale?	C major	B♭ major	F major	G major	A	Scales and Modes
Which of the following modes is **NOT** derived from the C major scale?	G Mixolydian	D Dorian	E Phrygian	E Mixolydian	D	Scales and Modes
Which of the following correctly lists the modes in order from brightest to darkest (based on their interval structures)?	Lydian, Mixolydian, Ionian, Dorian, Phrygian, Aeolian, Locrian	Ionian, Lydian, Mixolydian, Dorian, Aeolian, Phrygian, Locrian	Lydian, Ionian, Mixolydian, Dorian, Aeolian, Phrygian, Locrian	Locrian, Phrygian, Aeolian, Dorian, Mixolydian, Ionian, Lydian	C	Scales and Modes
If the G Mixolydian mode is derived from the C major scale, which mode begins on F in the same parent scale?	Lydian	Phrygian	Locrian	Aeolian	A	Scales and Modes
Which mode, derived from the major scale, features a major third and a minor seventh interval above the tonic?	Ionian (Major)	Dorian	Mixolydian	Phrygian	C	Scales and Modes
In which mode does the tritone interval occur between the tonic and the fourth scale degree?	Dorian	Phrygian	Lydian	Mixolydian	C	Scales and Modes
Which mode is characterized by a raised fourth scale degree compared to its parallel major scale?	Mixolydian	Dorian	Lydian	Locrian	C	Scales and Modes
Which mode is characterized by a raised fourth scale degree compared to the major scale (Ionian mode)?	Lydian	Mixolydian	Dorian	Phrygian	A	Scales and Modes
In alto clef, which pitch class is located on the fourth space?	F	A	C	E	A	Clefs and Notation
If a note is placed on the third space of the alto clef, which line or space would it occupy in the treble clef?	Second line	First space	Third line	Fourth space	B	Clefs and Notation
In which clef does middle C (C4) appear on the fourth line of the staff?	Alto clef	Tenor clef	Soprano clef	Baritone clef	B	Clefs and Notation
In the alto clef, which note is located on the fourth space?	E	F	G	D	B	Clefs and Notation
In the alto clef, which note is represented by a notehead placed on the fourth space?	F	D	E	G	A	Clefs and Notation
Which clef positions middle C on its fourth line?	Treble	Bass	Alto	Tenor	D	Clefs and Notation
In which clef does middle C appear on the fourth line of the staff?	Treble	Bass	Alto	Tenor	D	Clefs and Notation
A written pitch appears on the third line of the tenor clef. If this same pitch is notated in the alto clef, which line or space would it occupy?	Second line	Third space	Fourth space	Fifth line	A	Clefs and Notation
In which clef does middle C appear on the fourth line of the staff?	Treble	Bass	Tenor	Alto	C	Clefs and Notation
Which clef has the note B4 located on the middle line of the staff?	Treble	Bass	Alto	Tenor	A	Clefs and Notation
Which clef requires the most ledger lines above the staff to notate the note G5?	Treble	Alto	Tenor	Bass	D	Clefs and Notation
Which clef is a G clef positioned on the first line of the staff, historically used for French Baroque violin music?	French violin clef	Soprano clef	Baritone clef	Tenor clef	A	Clefs and Notation
A note is written on the third space of the alto clef. If the clef is changed to treble without altering the note's position, which letter name does it now have?	C	D	E	F	A	Clefs and Notation
In alto clef, which note is represented by a single ledger line below the staff?	E	C	F	D	D	Clefs and Notation
In tenor clef, where is middle C (C4) located on the staff?	Fourth line	Third space	Second line	Fifth line	A	Clefs and Notation
If a note is written on the second space of the tenor clef, what is its equivalent position in the bass clef?	Second line	Third space	First ledger line below the staff	Fourth space	D	Clefs and Notation
Which clef, when used, indicates that the written notes sound an octave lower than notated?	Soprano clef (C clef on the first line)	Treble clef with an 8 below	Alto clef (C clef on the third line)	Tenor clef (C clef on the fourth line)	B	Clefs and Notation
Which clef places middle C on the fourth line of the staff?	Alto clef	Soprano clef	Tenor clef	Baritone clef	C	Clefs and Notation
In which clef does the note E appear on the fourth line of the staff?	Treble	Bass	Alto	Tenor	C	Clefs and Notation
In which staff position is middle C located when using the tenor clef?	First ledger line below the staff	Third line of the staff	Fourth line of the staff	Second ledger line above the staff	C	Clefs and Notation
In which clef is middle C located on the third line of the staff?	Treble	Bass	Alto	Tenor	C	Clefs and Notation
In which clef does the third space of the staff correspond to the pitch D4?	Treble clef	Bass clef	Alto clef	Tenor clef	C	Clefs and Notation
Middle C (C4) is written on a ledger line in both treble and bass clefs. In which of the following clefs is Middle C located on a line within the staff itself?	Alto clef only	Tenor clef only	Both alto and tenor clefs	Soprano clef only	C	Clefs and Notation
In the alto clef, which note is located on the third line of the staff?	C4	E4	G4	B4	A	Clefs and Notation
Which dynamic marking indicates that a note should be played loudly and then immediately soften to a piano level?	Sforzando (sfz)	Crescendo (cresc.)	Fortepiano (fp)	Mezzo forte (mf)	C	Dynamics and Articulations
Which term describes a sudden reinforcement of sound, typically applied to a single note or chord, and is often abbreviated as "sfz"?	Crescendo	Sforzando	Rinforzando	Fortepiano	B	Dynamics and Articulations
Which of the following terms is an articulation marking indicating a note should be played with a short, detached manner?	Pianissimo	Marcato	Crescendo	Sforzando	B	Dynamics and Articulations
Which term instructs a musician to play loudly with a smooth connection between notes?	Forte legato	Piano staccato	Mezzo-forte tenuto	Fortissimo marcato	A	Dynamics and Articulations
Which articulation marking, when combined with the dynamic **mezzo-forte (mf)**, instructs the performer to play each note with a sharply accented attack followed by an immediate reduction in volume?	Marcato	Staccato	Tenuto	Legato	A	Dynamics and Articulations
Which dynamic marking indicates a sudden, strong accent on a single note or chord?	sforzando (sfz)	marcato (^)	crescendo (cresc.)	staccato (•)	A	Dynamics and Articulations
How should a musician perform a series of staccato notes marked with a crescendo?	Play notes legato and gradually louder	Play notes short and gradually softer	Play notes short and gradually louder	Play notes with emphasis and constant volume	C	Dynamics and Articulations
Which dynamic marking instructs a performer to play a sudden, strong attack followed by an immediate decrease to a soft dynamic?	Crescendo (cresc.)	Fortepiano (fp)	Sforzando piano (sfp)	Diminuendo (dim.)	C	Dynamics and Articulations
Which of the following terms indicates a gradual increase in dynamic volume, and is also classified as a type of articulation?	Crescendo	Sforzando	Tenuto	Staccato	A	Dynamics and Articulations
Which articulation marking indicates that a note should be played with a strong emphasis, often accompanied by a dynamic accent?	Legato	Staccato	Tenuto	Marcato	D	Dynamics and Articulations
Which articulation marking is typically indicated by a horizontal line placed above or below a note?	Staccato	Marcato	Tenuto	Legato	C	Dynamics and Articulations
Which dynamic marking indicates a sudden, strong accent on a single note or chord?	Marcato	Sforzando (sfz)	Crescendo	Fortissimo (ff)	B	Dynamics and Articulations
In a musical score, if a quarter note is marked with both a staccato dot and a forte (f) dynamic, how should it be performed?	Loud and detached	Soft and detached	Loud and smoothly connected	Soft and smoothly connected	A	Dynamics and Articulations
Which combination of dynamic and articulation markings indicates a note that is suddenly loud and played with a sharp, emphasized attack?	Piano with staccato	Mezzo-forte with tenuto	Forte with sforzando	Crescendo with marcato	C	Dynamics and Articulations
Which of the following terms refers to both a dynamic marking and an articulation indicating a note should be played with a strongly emphasized, detached attack?	Tenuto	Marcato	Sforzando	Mezzo piano	B	Dynamics and Articulations
Which articulation marking instructs a performer to play a note with a sharp, forced emphasis followed by an immediate decrease in volume?	Tenuto	Sforzando-piano (sfp)	Marcato	Legato	B	Dynamics and Articulations
In a musical passage, the marking "fp" followed by a crescendo (𝆑) indicates which of the following performance instructions?	Play loudly, then suddenly softly, then gradually increase volume	Play softly with a crescendo throughout	Play loudly with a sudden accent, then continue loudly	Play softly, then immediately loudly with a crescendo	A	Dynamics and Articulations
Which articulation marking is represented by a vertical wedge (^) above a note and indicates a strong, accented attack with a shortened duration?	Staccato	Marcato	Tenuto	Accent	B	Dynamics and Articulations
Which dynamic marking indicates a sudden, strong accent on a single note or chord followed by an immediate decrease in volume?	sfz	fp	rfz	sfp	B	Dynamics and Articulations
Which musical term indicates a sudden, strong accent on a note followed by an immediate return to the original dynamic level?	Fortepiano (fp)	Sforzando (sfz)	Crescendo (cresc.)	Marcato (^)	A	Dynamics and Articulations
Which dynamic marking instructs the performer to play a note loudly and then immediately soften to a quiet dynamic?	Crescendo (⇡)	Decrescendo (⇣)	Sforzando (sfz)	Fortepiano (fp)	D	Dynamics and Articulations
Which of the following terms is an articulation marking rather than a dynamic indication?	Forte	Piano	Mezzo-piano	Marcato	D	Dynamics and Articulations
Which dynamic marking indicates a sudden, strong emphasis on a single note or chord, typically executed with a sharp attack?	Marcato	Fortepiano	Sforzando	Rinforzando	C	Dynamics and Articulations
Which dynamic or articulation marking indicates a sudden, strong accent followed immediately by a rapid decrease in volume?	sfz	fp	sfzp	rfz	C	Dynamics and Articulations
What is the term for a gradual increase in loudness followed by a gradual decrease, often notated with a crescendo then decrescendo hairpin?	Rinforzando	Calando	Messa di voce	Morendo	C	Dynamics and Articulations
In a musical score, which combination of symbols and terms indicates that a passage should begin softly, gradually increase in volume, and be played with detached notes?	*p* – *crescendo* – *staccato*	*f* – *decrescendo* – *legato*	*mp* – *diminuendo* – *tenuto*	*pp* – *sforzando* – *accent*	A	Dynamics and Articulations
Which articulation marking indicates a note should be played with a sudden, strong emphasis followed by an immediate decrease in dynamics?	Staccato	Marcato	Sforzando	Tenuto	C	Dynamics and Articulations
Which dynamic marking indicates a sudden, strong accent on a single note or chord, followed by an immediate return to the original volume?	Fortepiano	Sforzando	Crescendo	Tenuto	B	Dynamics and Articulations
Which dynamic marking indicates a sudden, strong accent on a single note or chord followed by an immediate decrease in volume?	sfz	fp	rfz	cresc.	B	Dynamics and Articulations
Which dynamic marking instructs a performer to play a note or chord with a sudden, strong emphasis followed by an immediate decrease in volume?	Marcato	Sforzando	Fortepiano	Rinforzando	C	Dynamics and Articulations
Which dynamic marking instructs the performer to suddenly shift from loud to soft, often combined with a sharp, detached articulation?	Sforzando (sfz)	Fortepiano (fp)	Decrescendo ( )	Marcato (^)	B	Dynamics and Articulations
Which dynamic marking instructs a performer to play a note or chord loudly and then immediately soften?	Sforzando (sfz)	Fortepiano (fp)	Crescendo (cresc.)	Decrescendo (decresc.)	B	Dynamics and Articulations
Which dynamic and articulation marking combination indicates a sudden, strong accent followed by a gradual decrease in volume?	*sfz* followed by *decrescendo*	*fp* followed by *diminuendo*	*crescendo* followed by *sfz*	*sfz* followed by *fp*	A	Dynamics and Articulations
Which dynamic marking is typically used to indicate a sudden, strong accent on a single note or chord, followed by an immediate return to the original dynamic?	Pianissimo (pp)	Mezzo-forte (mf)	Sforzando (sfz)	Crescendo (cresc.)	C	Dynamics and Articulations
Which dynamic marking indicates a moderately loud volume, and when combined with a staccato articulation, how should the note be performed?	Mezzo-forte; moderately loud with a short, detached sound	Mezzo-piano; moderately soft and smoothly connected	Fortissimo; very loud with a heavy accent	Pianissimo; very soft with a gradual crescendo	A	Dynamics and Articulations
Which dynamic or articulation marking instructs the performer to play a note with a sudden strong accent followed immediately by a soft volume?	Sforzando (sfz)	Fortepiano (fp)	Crescendo ( )	Marcato (^)	B	Dynamics and Articulations
Which of the following terms is classified as a dynamic marking rather than an articulation?	Legato	Sforzando	Tenuto	Marcato	B	Dynamics and Articulations
Which dynamic marking indicates that a note should be played loudly and then immediately soften to a piano level?	Sforzando (sfz)	Crescendo (cresc.)	Fortepiano (fp)	Mezzo forte (mf)	C	Dynamics and Articulations
Which term describes a sudden reinforcement of sound, typically applied to a single note or chord, and is often abbreviated as "sfz"?	Crescendo	Sforzando	Rinforzando	Fortepiano	B	Dynamics and Articulations
Which of the following terms is an articulation marking indicating a note should be played with a short, detached manner?	Pianissimo	Marcato	Crescendo	Sforzando	B	Dynamics and Articulations
Which term instructs a musician to play loudly with a smooth connection between notes?	Forte legato	Piano staccato	Mezzo-forte tenuto	Fortissimo marcato	A	Dynamics and Articulations
Which articulation marking, when combined with the dynamic **mezzo-forte (mf)**, instructs the performer to play each note with a sharply accented attack followed by an immediate reduction in volume?	Marcato	Staccato	Tenuto	Legato	A	Dynamics and Articulations
Which dynamic marking indicates a sudden, strong accent on a single note or chord?	sforzando (sfz)	marcato (^)	crescendo (cresc.)	staccato (•)	A	Dynamics and Articulations
How should a musician perform a series of staccato notes marked with a crescendo?	Play notes legato and gradually louder	Play notes short and gradually softer	Play notes short and gradually louder	Play notes with emphasis and constant volume	C	Dynamics and Articulations
Which dynamic marking instructs a performer to play a sudden, strong attack followed by an immediate decrease to a soft dynamic?	Crescendo (cresc.)	Fortepiano (fp)	Sforzando piano (sfp)	Diminuendo (dim.)	C	Dynamics and Articulations
Which of the following terms indicates a gradual increase in dynamic volume, and is also classified as a type of articulation?	Crescendo	Sforzando	Tenuto	Staccato	A	Dynamics and Articulations
Which articulation marking indicates that a note should be played with a strong emphasis, often accompanied by a dynamic accent?	Legato	Staccato	Tenuto	Marcato	D	Dynamics and Articulations
Which articulation marking is typically indicated by a horizontal line placed above or below a note?	Staccato	Marcato	Tenuto	Legato	C	Dynamics and Articulations
Which dynamic marking indicates a sudden, strong accent on a single note or chord?	Marcato	Sforzando (sfz)	Crescendo	Fortissimo (ff)	B	Dynamics and Articulations
In a musical score, if a quarter note is marked with both a staccato dot and a forte (f) dynamic, how should it be performed?	Loud and detached	Soft and detached	Loud and smoothly connected	Soft and smoothly connected	A	Dynamics and Articulations
Which combination of dynamic and articulation markings indicates a note that is suddenly loud and played with a sharp, emphasized attack?	Piano with staccato	Mezzo-forte with tenuto	Forte with sforzando	Crescendo with marcato	C	Dynamics and Articulations
Which of the following terms refers to both a dynamic marking and an articulation indicating a note should be played with a strongly emphasized, detached attack?	Tenuto	Marcato	Sforzando	Mezzo piano	B	Dynamics and Articulations
Which articulation marking instructs a performer to play a note with a sharp, forced emphasis followed by an immediate decrease in volume?	Tenuto	Sforzando-piano (sfp)	Marcato	Legato	B	Dynamics and Articulations
In a musical passage, the marking "fp" followed by a crescendo (𝆑) indicates which of the following performance instructions?	Play loudly, then suddenly softly, then gradually increase volume	Play softly with a crescendo throughout	Play loudly with a sudden accent, then continue loudly	Play softly, then immediately loudly with a crescendo	A	Dynamics and Articulations
Which articulation marking is represented by a vertical wedge (^) above a note and indicates a strong, accented attack with a shortened duration?	Staccato	Marcato	Tenuto	Accent	B	Dynamics and Articulations
Which dynamic marking indicates a sudden, strong accent on a single note or chord followed by an immediate decrease in volume?	sfz	fp	rfz	sfp	B	Dynamics and Articulations
Which musical term indicates a sudden, strong accent on a note followed by an immediate return to the original dynamic level?	Fortepiano (fp)	Sforzando (sfz)	Crescendo (cresc.)	Marcato (^)	A	Dynamics and Articulations
Which dynamic marking instructs the performer to play a note loudly and then immediately soften to a quiet dynamic?	Crescendo (⇡)	Decrescendo (⇣)	Sforzando (sfz)	Fortepiano (fp)	D	Dynamics and Articulations
Which of the following terms is an articulation marking rather than a dynamic indication?	Forte	Piano	Mezzo-piano	Marcato	D	Dynamics and Articulations
Which dynamic marking indicates a sudden, strong emphasis on a single note or chord, typically executed with a sharp attack?	Marcato	Fortepiano	Sforzando	Rinforzando	C	Dynamics and Articulations
Which dynamic or articulation marking indicates a sudden, strong accent followed immediately by a rapid decrease in volume?	sfz	fp	sfzp	rfz	C	Dynamics and Articulations
What is the term for a gradual increase in loudness followed by a gradual decrease, often notated with a crescendo then decrescendo hairpin?	Rinforzando	Calando	Messa di voce	Morendo	C	Dynamics and Articulations
In a musical score, which combination of symbols and terms indicates that a passage should begin softly, gradually increase in volume, and be played with detached notes?	*p* – *crescendo* – *staccato*	*f* – *decrescendo* – *legato*	*mp* – *diminuendo* – *tenuto*	*pp* – *sforzando* – *accent*	A	Dynamics and Articulations
Which articulation marking indicates a note should be played with a sudden, strong emphasis followed by an immediate decrease in dynamics?	Staccato	Marcato	Sforzando	Tenuto	C	Dynamics and Articulations
Which dynamic marking indicates a sudden, strong accent on a single note or chord, followed by an immediate return to the original volume?	Fortepiano	Sforzando	Crescendo	Tenuto	B	Dynamics and Articulations
Which dynamic marking indicates a sudden, strong accent on a single note or chord followed by an immediate decrease in volume?	sfz	fp	rfz	cresc.	B	Dynamics and Articulations
Which dynamic marking instructs a performer to play a note or chord with a sudden, strong emphasis followed by an immediate decrease in volume?	Marcato	Sforzando	Fortepiano	Rinforzando	C	Dynamics and Articulations
Which dynamic marking instructs the performer to suddenly shift from loud to soft, often combined with a sharp, detached articulation?	Sforzando (sfz)	Fortepiano (fp)	Decrescendo ( )	Marcato (^)	B	Dynamics and Articulations
Which dynamic marking instructs a performer to play a note or chord loudly and then immediately soften?	Sforzando (sfz)	Fortepiano (fp)	Crescendo (cresc.)	Decrescendo (decresc.)	B	Dynamics and Articulations
Which dynamic and articulation marking combination indicates a sudden, strong accent followed by a gradual decrease in volume?	*sfz* followed by *decrescendo*	*fp* followed by *diminuendo*	*crescendo* followed by *sfz*	*sfz* followed by *fp*	A	Dynamics and Articulations
Which dynamic marking is typically used to indicate a sudden, strong accent on a single note or chord, followed by an immediate return to the original dynamic?	Pianissimo (pp)	Mezzo-forte (mf)	Sforzando (sfz)	Crescendo (cresc.)	C	Dynamics and Articulations
Which dynamic marking indicates a moderately loud volume, and when combined with a staccato articulation, how should the note be performed?	Mezzo-forte; moderately loud with a short, detached sound	Mezzo-piano; moderately soft and smoothly connected	Fortissimo; very loud with a heavy accent	Pianissimo; very soft with a gradual crescendo	A	Dynamics and Articulations
Which dynamic or articulation marking instructs the performer to play a note with a sudden strong accent followed immediately by a soft volume?	Sforzando (sfz)	Fortepiano (fp)	Crescendo ( )	Marcato (^)	B	Dynamics and Articulations
Which of the following terms is classified as a dynamic marking rather than an articulation?	Legato	Sforzando	Tenuto	Marcato	B	Dynamics and Articulations
In which musical form is a piece structured as ABA, where the opening section (A) returns after a contrasting middle section (B)?	Ternary form	Rondo form	Sonata form	Through-composed form	A	Form and Structure
Which of the following forms is a common example of composite ternary structure, where each main section (A and B) is itself a binary or ternary form?	Sonata form	Strophic form	Minuet and Trio	Da capo aria	C	Form and Structure
In which musical form is the overall structure ABA, with both the A and B sections each comprising their own binary form?	Sonata-allegro	Rondo	Minuet and Trio	Strophic	C	Form and Structure
Which musical form is characterized by a recurring main theme (A) that alternates with contrasting sections (B, C, etc.), often resulting in a structure such as ABACABA?	Sonata form	Rondo form	Ternary form	Theme and Variations	B	Form and Structure
In which musical form is the structure characterized by the return of the opening material in the second section, creating an "A B A'" design, but without a full recapitulation of the initial section as a standalone third part?	Binary form	Rounded binary form	Ternary form	Through-composed form	B	Form and Structure
Which form is characterized by an ABA structure and is most commonly associated with the third movement of classical symphonies, such as those by Haydn or Mozart?	Sonata-allegro	Rondo	Ternary	Binary	C	Form and Structure
Which musical form is characterized by the structure ABCBA, where the initial material returns in reverse order after a central section?	Sonata-allegro form	Arch form	Rondo form	Ternary form	B	Form and Structure
In sonata form, which section is primarily responsible for modulating from the tonic key to the dominant key (or relative major in a minor-key work) during the exposition?	Primary theme	Transition	Secondary theme	Coda	B	Form and Structure
In a jazz standard following the 32-bar song form, which structure typically features two contrasting melodies in the pattern AABA?	Verse-Chorus form	Sonata-Allegro form	Rondo form	32-bar AABA form	D	Form and Structure
In which musical form is the structure typically represented as A-B-A, where the B section provides contrast before returning to the original material?	Ternary form	Binary form	Rondo form	Sonata form	A	Form and Structure
Which of the following best describes a composite ternary form in classical music?	A three-part structure where each section is a simple phrase	A structure with an exposition, development, and recapitulation	A three-part form where each section is itself a binary form	A structure featuring alternating themes in a ABACABA pattern	C	Form and Structure
In a piece labeled A-B-A', where the A' section is a varied repetition of the opening A section, which musical form is most likely being used?	Ternary form	Modified strophic form	Arch form	Sonata form	A	Form and Structure
In a da capo aria, which musical form is typically employed to structure the piece?	Binary form	Ternary form	Sonata form	Rondo form	B	Form and Structure
In a da capo aria, which formal structure is typically employed, featuring an A section, a contrasting B section, and then a return to the A section?	Ternary form	Sonata form	Rondo form	Strophic form	A	Form and Structure
In a composite ternary form, how do the internal structures of the A and B sections typically compare to those in a simple ternary form?	The sections are shorter and less harmonically stable	The sections are expanded into smaller binary or ternary forms	The sections abandon tonal centers entirely	The sections repeat in reverse order (e.g., ABBA)	B	Form and Structure
In a classical minuet and trio movement, what is the overall form created when the minuet returns after the trio section?	Binary form	Rondo form	Sonata form	Ternary form	D	Form and Structure
In musical form and structure, which of the following is characterized by a symmetrical pattern of ABCBA, where the opening and closing sections mirror each other around a central contrasting episode?	Rondo form	Sonata form	Da capo aria	Arch form	D	Form and Structure
In sonata-rondo form, which structural pattern best represents the combination of sonata and rondo elements?	ABACA	ABA	ABACABA	AABABCAB	C	Form and Structure
Which musical form is characterized by a recurring main theme (A) that alternates with contrasting episodes (B, C, etc.), resulting in a structure such as ABACA?	Sonata form	Fugue	Rondo	Ternary	C	Form and Structure
In a piece labeled as **Ternary Form**, which structural characteristic is most essential?	A three-part structure with the return of the A section varied significantly	A two-part structure where the second part repeats the first with embellishments	A structure consisting of alternating contrasting sections (ABACA)	A three-part structure (ABA) where each section is harmonically closed and thematically distinct	D	Form and Structure
