# Supplementary material
Source: ML conference proceedings conference paper supplement (https://openreview.net/forum?id=kDqH5KmRWR)
Supplement: supplementary_material [file question_demo.xlsx]

## Sheet: music_eval_questions_2025-05-13
ABC File	image_1	image_2	image_3	image_4	image_5	image_6	image_7	image_8	Title	Composer	Meter	Key Signature	Category	Subcategory	Question	Option A	Option B	Option C	Option D	Correct Option
Qma4GpDPWmUHYarDViF8F1GvaKKX2pz5uc7qDWwCN3RGV6.abc	extracted_images\img_1.png	extracted_images\img_2.png	extracted_images\img_3.png						Parting	Unknown	"4/4"	C	Information Extraction	Key Signature Recognition	At which measure does the key signature change from C major to E-flat major in the given score?	Measure 28	Measure 33	Measure 20	Measure 8	A
Qma4GpDPWmUHYarDViF8F1GvaKKX2pz5uc7qDWwCN3RGV6.abc	extracted_images\img_4.png	extracted_images\img_5.png	extracted_images\img_6.png						Parting	Unknown	"4/4"	C	Information Extraction	Voice/Instrument Identification	Which voice in this score is most likely assigned to a bass instrument based on its clef and the range of notes it plays?	V:1	V:2	V:3	V:4	C
Qma4GpDPWmUHYarDViF8F1GvaKKX2pz5uc7qDWwCN3RGV6.abc	extracted_images\img_7.png	extracted_images\img_8.png	extracted_images\img_9.png						Parting	Unknown	"4/4"	C	Information Extraction	Composer Recognition	Based on the key changes and harmonic progression evident in this score, which composer is most likely associated with this piece titled "Parting"?	Johann Sebastian Bach	Ludwig van Beethoven	Frédéric Chopin	Claude Debussy	C
Qma4GpDPWmUHYarDViF8F1GvaKKX2pz5uc7qDWwCN3RGV6.abc	extracted_images\img_10.png	extracted_images\img_11.png	extracted_images\img_12.png						Parting	Unknown	"4/4"	C	Symbolic Analysis	Note Localization	In the first measure of voice 1, which note is played simultaneously with the note c' in the chord?	e'	f'	_b	_e'	B
Qma4GpDPWmUHYarDViF8F1GvaKKX2pz5uc7qDWwCN3RGV6.abc	extracted_images\img_13.png	extracted_images\img_14.png	extracted_images\img_15.png						Parting	Unknown	"4/4"	C	Symbolic Analysis	Harmony Identification	In the measure where the key changes to E-flat major, what is the harmonic function of the chord formed by the bass notes D, B, d, and f (with the upper voice notes a, b, f', and b')?	V7 chord (dominant seventh) in E-flat major	IV7 chord (subdominant seventh) in E-flat major	ii7 chord (supertonic seventh) in E-flat major	vi7 chord (submediant seventh) in E-flat major	A
Qma4GpDPWmUHYarDViF8F1GvaKKX2pz5uc7qDWwCN3RGV6.abc	extracted_images\img_16.png	extracted_images\img_17.png	extracted_images\img_18.png						Parting	Unknown	"4/4"	C	Symbolic Analysis	Key Modulation Recognition	At which point in the score does the key change from C major to E-flat major?	Beginning of measure 27	Beginning of measure 33	Beginning of measure 37	Beginning of measure 41	A
Qma4GpDPWmUHYarDViF8F1GvaKKX2pz5uc7qDWwCN3RGV6.abc	extracted_images\img_19.png	extracted_images\img_20.png	extracted_images\img_21.png						Parting	Unknown	"4/4"	C	High-Level Musical Understanding	Non-Chord Tone Identification	In the first measure of the treble voice (V:1), which note functions as a non-chord tone?	E' (natural)	_E' (E flat)	D' (D natural)	C' (C natural)	B
Qma67RizxStsuBuEmSfV5Ly8Hu85NwoYwdBsYVXorKRBJU.abc	extracted_images\img_22.png	extracted_images\img_23.png							Eva St. Polen	Unknown	"4/4"	G	Information Extraction	Composer Recognition	According to the ABC notation header, who is credited as the composer of the piece titled "Classical Rag"?	Scott Joplin	Eva St. Polen	George Gershwin	Irving Berlin	B
Qma67RizxStsuBuEmSfV5Ly8Hu85NwoYwdBsYVXorKRBJU.abc	extracted_images\img_24.png	extracted_images\img_25.png							Eva St. Polen	Unknown	"4/4"	G	Information Extraction	Meter Recognition	Based on the given ABC notation, what is the meter of the piece "Classical Rag" by Eva St. Polen as indicated in the header?	“3/4”	"6/8"	"4/4"	"2/2"	C
Qma67RizxStsuBuEmSfV5Ly8Hu85NwoYwdBsYVXorKRBJU.abc	extracted_images\img_26.png	extracted_images\img_27.png							Eva St. Polen	Unknown	"4/4"	G	Symbolic Analysis	Instrumentation	Which voices in the score are written in the bass clef, indicating their likely instrumentation range?	V:1 and V:2	V:2 and V:3	V:3 and V:4	V:1 and V:4	C
Qma67RizxStsuBuEmSfV5Ly8Hu85NwoYwdBsYVXorKRBJU.abc	extracted_images\img_28.png	extracted_images\img_29.png							Eva St. Polen	Unknown	"4/4"	G	Symbolic Analysis	Harmony Identification	In measure 3 of the score, what is the harmonic function of the chord formed by the notes [G, C, E] in the bass voice (V:3) combined with the melody note G' in the treble voice (V:1)?	G major tonic chord (I)	C major subdominant chord (IV)	D major dominant chord (V)	E minor relative minor chord (vi)	B
Qma67RizxStsuBuEmSfV5Ly8Hu85NwoYwdBsYVXorKRBJU.abc	extracted_images\img_30.png	extracted_images\img_31.png							Eva St. Polen	Unknown	"4/4"	G	High-Level Musical Understanding	Non-Chord Tone Identification	In measure 7 of the treble voice (V:1), which note functions as a passing tone between chord tones in the melodic line?	The G' in the triplet figure	The E natural in the [EBd] chord	The D natural following the triplet	The C natural in the arpeggiated figure	C
Qma7jk7rnWMkZEnKrE6yDDR6aL3jyVsASNXqeite4LMPFp.abc	extracted_images\img_32.png	extracted_images\img_33.png							Snake Eater	Unknown	"2/4"	A	Information Extraction	Title Recognition	What is the title of the piece as indicated in the ABC notation header?	The Legend of Zelda	Snake Eater	Metal Gear Theme	Final Boss Battle	B
Qma7jk7rnWMkZEnKrE6yDDR6aL3jyVsASNXqeite4LMPFp.abc	extracted_images\img_34.png	extracted_images\img_35.png							Snake Eater	Unknown	"2/4"	A	Information Extraction	Voice/Instrument Identification	Which voice in the score primarily plays the lowest pitch range, indicating it is most likely the bass instrument part?	V:1	V:2	V:3	V:4	C
Qma7jk7rnWMkZEnKrE6yDDR6aL3jyVsASNXqeite4LMPFp.abc	extracted_images\img_36.png	extracted_images\img_37.png							Snake Eater	Unknown	"2/4"	A	Information Extraction	Key Signature Recognition	What is the key signature of the piece as indicated at the beginning of the score?	C major (no sharps or flats)	A major (three sharps)	F major (one flat)	D minor (one flat)	B
Qma7jk7rnWMkZEnKrE6yDDR6aL3jyVsASNXqeite4LMPFp.abc	extracted_images\img_38.png	extracted_images\img_39.png							Snake Eater	Unknown	"2/4"	A	Symbolic Analysis	Note Localization	In which measure does voice 3 first play the note E, located one octave below middle C (E,)?	Measure 17	Measure 26	Measure 33	Measure 40	A
Qma7jk7rnWMkZEnKrE6yDDR6aL3jyVsASNXqeite4LMPFp.abc	extracted_images\img_40.png	extracted_images\img_41.png							Snake Eater	Unknown	"2/4"	A	Symbolic Analysis	Note Frequency Statistics	In voice V:3, which pitch class appears most frequently as a sounding note (excluding rests and grace notes) throughout the piece?	C,	D,	B,,	F,,	A
Qma7jk7rnWMkZEnKrE6yDDR6aL3jyVsASNXqeite4LMPFp.abc	extracted_images\img_42.png	extracted_images\img_43.png							Snake Eater	Unknown	"2/4"	A	Symbolic Analysis	Instrumentation	Which of the following best describes the instrumental tessitura distribution among the four voices in this score?	V:1 and V:2 play in the treble range, V:3 and V:4 in the bass range	V:1 and V:3 play in the treble range, V:2 and V:4 in the bass range	V:1 and V:4 play in the treble range, V:2 and V:3 in the bass range	All voices play predominantly in the treble range	A
Qma7jk7rnWMkZEnKrE6yDDR6aL3jyVsASNXqeite4LMPFp.abc	extracted_images\img_44.png	extracted_images\img_45.png							Snake Eater	Unknown	"2/4"	A	High-Level Musical Understanding	Ornamentation Recognition	Which ornamentation technique is consistently used in voice V:1 on the repeated chord patterns such as [FAc], [EGB], and [DFA]?	Trill	Mordent	Arpeggiated chord (broken chord)	Grace note	C
Qma7jk7rnWMkZEnKrE6yDDR6aL3jyVsASNXqeite4LMPFp.abc	extracted_images\img_46.png	extracted_images\img_47.png							Snake Eater	Unknown	"2/4"	A	High-Level Musical Understanding	Non-Chord Tone Identification	In the passage where the chord changes from F major to E minor (measures 19-22), which note in the soprano voice (V:1) functions as a passing tone?	A in measure 20	G in measure 21	F in measure 19	E in measure 22	B
Qma7rPK4y2Hms7w9u7sQc7gvBe9qj9nu76i9yjEk8TWo3k.abc	extracted_images\img_48.png	extracted_images\img_49.png	extracted_images\img_50.png	extracted_images\img_51.png	extracted_images\img_52.png	extracted_images\img_53.png	extracted_images\img_54.png		PRIMAVERA PORTENA	ASTOR PIAZZOLLA	"4/4"	Bb	Information Extraction	Key Signature Recognition	What is the key signature of the piece as indicated at the beginning of the score?	B major (5 sharps)	B-flat major (2 flats)	E-flat major (3 flats)	G minor (2 flats)	B
Qma7rPK4y2Hms7w9u7sQc7gvBe9qj9nu76i9yjEk8TWo3k.abc	extracted_images\img_55.png	extracted_images\img_56.png	extracted_images\img_57.png	extracted_images\img_58.png	extracted_images\img_59.png	extracted_images\img_60.png	extracted_images\img_61.png		PRIMAVERA PORTENA	ASTOR PIAZZOLLA	"4/4"	Bb	Information Extraction	Title Recognition	What is the exact title of the piece as indicated in the ABC notation header?	Primavera Porte?a	PRIMAVERA PORTENA	Primavera Porte?a by Astor Piazzolla	Primavera Porte?a (Astor Piazzolla)	B
Qma7rPK4y2Hms7w9u7sQc7gvBe9qj9nu76i9yjEk8TWo3k.abc	extracted_images\img_62.png	extracted_images\img_63.png	extracted_images\img_64.png	extracted_images\img_65.png	extracted_images\img_66.png	extracted_images\img_67.png	extracted_images\img_68.png		PRIMAVERA PORTENA	ASTOR PIAZZOLLA	"4/4"	Bb	Symbolic Analysis	Harmony Identification	In measure 44 of the score, which chord is explicitly notated and can be identified by the notes A, B, and D played simultaneously?	D major triad	B minor triad	D minor triad	G major triad	C
Qma7rPK4y2Hms7w9u7sQc7gvBe9qj9nu76i9yjEk8TWo3k.abc	extracted_images\img_69.png	extracted_images\img_70.png	extracted_images\img_71.png	extracted_images\img_72.png	extracted_images\img_73.png	extracted_images\img_74.png	extracted_images\img_75.png		PRIMAVERA PORTENA	ASTOR PIAZZOLLA	"4/4"	Bb	Symbolic Analysis	Rhythmic Pattern Analysis	In the first four measures of the melody line (V:1), which rhythmic pattern is predominantly used for the repeated chord figures?	Triplet eighth notes followed by a quarter rest	Dotted quarter note followed by an eighth note	Quarter note followed by three sixteenth notes	Three tied half notes across measures	C
Qma7rPK4y2Hms7w9u7sQc7gvBe9qj9nu76i9yjEk8TWo3k.abc	extracted_images\img_76.png	extracted_images\img_77.png	extracted_images\img_78.png	extracted_images\img_79.png	extracted_images\img_80.png	extracted_images\img_81.png	extracted_images\img_82.png		PRIMAVERA PORTENA	ASTOR PIAZZOLLA	"4/4"	Bb	High-Level Musical Understanding	Non-Chord Tone Identification	In measure 9 of the treble voice 1 (V:1), which note functions as a non-chord tone, specifically a passing tone, between chord tones in the Bb major context?	The note F' (af')	The note G' (ge')	The note D' (d')	The note A' (a^f')	B
Qma7rPK4y2Hms7w9u7sQc7gvBe9qj9nu76i9yjEk8TWo3k.abc	extracted_images\img_83.png	extracted_images\img_84.png	extracted_images\img_85.png	extracted_images\img_86.png	extracted_images\img_87.png	extracted_images\img_88.png	extracted_images\img_89.png		PRIMAVERA PORTENA	ASTOR PIAZZOLLA	"4/4"	Bb	High-Level Musical Understanding	Mode Identification	Based on the harmonic content and pitch collection in the opening measures of the score, which mode is primarily employed in the melody of voice V:1?	Mixolydian mode on B?	Dorian mode on B?	Lydian mode on B?	Aeolian mode on B?	B
QmaaMxNHBkHZN9sfF99LwmLLCv6P4SRhAqYRMFJEcgwuQr.abc	extracted_images\img_90.png								Turn you eyes upon Jesus	Toni.Metelus	"3/4"	F	Information Extraction	Meter Recognition	What is the meter signature of the piece as indicated in the ABC notation?	"4/4"	"3/4"	"6/8"	"2/4"	B
QmaaMxNHBkHZN9sfF99LwmLLCv6P4SRhAqYRMFJEcgwuQr.abc	extracted_images\img_91.png								Turn you eyes upon Jesus	Toni.Metelus	"3/4"	F	Information Extraction	Key Signature Recognition	What is the key signature of the piece indicated in the ABC notation?	C major (no sharps or flats)	F major (one flat)	G major (one sharp)	B-flat major (two flats)	B
QmaaMxNHBkHZN9sfF99LwmLLCv6P4SRhAqYRMFJEcgwuQr.abc	extracted_images\img_92.png								Turn you eyes upon Jesus	Toni.Metelus	"3/4"	F	Information Extraction	Voice/Instrument Identification	Which voice first plays the chord containing the note B natural in the bass clef?	V:1	V:2	V:3	V:4	C
QmaaMxNHBkHZN9sfF99LwmLLCv6P4SRhAqYRMFJEcgwuQr.abc	extracted_images\img_93.png								Turn you eyes upon Jesus	Toni.Metelus	"3/4"	F	Symbolic Analysis	Note Localization	In which measure does voice V:1 first play a chord containing the note E natural above middle C?	Measure 18	Measure 20	Measure 21	Measure 23	A
QmaaMxNHBkHZN9sfF99LwmLLCv6P4SRhAqYRMFJEcgwuQr.abc	extracted_images\img_94.png								Turn you eyes upon Jesus	Toni.Metelus	"3/4"	F	Symbolic Analysis	Harmony Identification	In measure 18, which chord is formed by the combination of the soprano (V:1) and bass (V:3) notes?	F major triad in root position	D minor triad in first inversion	E diminished triad in root position	G minor triad in second inversion	A
QmaaMxNHBkHZN9sfF99LwmLLCv6P4SRhAqYRMFJEcgwuQr.abc	extracted_images\img_95.png								Turn you eyes upon Jesus	Toni.Metelus	"3/4"	F	High-Level Musical Understanding	Functional Harmony Analysis	In measure 21, what is the functional harmonic role of the chord formed by the notes E, G, and C in the key of F major?	Tonic (I) chord	Subdominant (IV) chord	Dominant (V) chord	Mediant (iii) chord	B
QmaaMxNHBkHZN9sfF99LwmLLCv6P4SRhAqYRMFJEcgwuQr.abc	extracted_images\img_96.png								Turn you eyes upon Jesus	Toni.Metelus	"3/4"	F	High-Level Musical Understanding	Melodic Range	What is the melodic range (from lowest to highest pitch) found in the bass voice (V:3) throughout the piece?	From D,, to A,	From B,, to G,	From F,, to D,	From C, to B,	C
QmaBuA8PFRfX54AuFEjHoRD5A57HLNyRaUFn3jB433S5ZC.abc	extracted_images\img_97.png	extracted_images\img_98.png	extracted_images\img_99.png	extracted_images\img_100.png	extracted_images\img_101.png	extracted_images\img_102.png	extracted_images\img_103.png		Camp Slasher Theme	Unknown	"4/4"	Bb	Information Extraction	Title Recognition	What is the title of the piece as indicated in the ABC notation header?	Campfire Melody	Camp Slasher Theme	Slasher Camp Tune	The Campfire Horror	B
QmaBuA8PFRfX54AuFEjHoRD5A57HLNyRaUFn3jB433S5ZC.abc	extracted_images\img_104.png	extracted_images\img_105.png	extracted_images\img_106.png	extracted_images\img_107.png	extracted_images\img_108.png	extracted_images\img_109.png	extracted_images\img_110.png		Camp Slasher Theme	Unknown	"4/4"	Bb	Information Extraction	Key Signature Recognition	At which point in the score does the key signature change from B-flat major to A-flat major?	After measure 12	After measure 24	After measure 36	After measure 48	A
QmaBuA8PFRfX54AuFEjHoRD5A57HLNyRaUFn3jB433S5ZC.abc	extracted_images\img_111.png	extracted_images\img_112.png	extracted_images\img_113.png	extracted_images\img_114.png	extracted_images\img_115.png	extracted_images\img_116.png	extracted_images\img_117.png		Camp Slasher Theme	Unknown	"4/4"	Bb	Information Extraction	Voice/Instrument Identification	Which voices are assigned to the bass clef in this ABC notation?	V:1 and V:2	V:3 and V:4	V:2 and V:3	V:1 and V:4	B
QmaBuA8PFRfX54AuFEjHoRD5A57HLNyRaUFn3jB433S5ZC.abc	extracted_images\img_118.png	extracted_images\img_119.png	extracted_images\img_120.png	extracted_images\img_121.png	extracted_images\img_122.png	extracted_images\img_123.png	extracted_images\img_124.png		Camp Slasher Theme	Unknown	"4/4"	Bb	Symbolic Analysis	Note Frequency Statistics	In the first 16 measures of Voice 1, which note appears the most frequently?	G	A	B	E?	A
QmaEh5BBU6ZW2VdmrPBYoqGP1yiPFnXaw6MaRTKVqcNa46.abc	extracted_images\img_125.png	extracted_images\img_126.png							Shostglass	Unknown	"3/4"	Db	Information Extraction	Voice/Instrument Identification	Which voice in the score consistently plays the harmonic accompaniment using chords in the bass clef?	V:1	V:2	V:3	V:4	C
QmaEh5BBU6ZW2VdmrPBYoqGP1yiPFnXaw6MaRTKVqcNa46.abc	extracted_images\img_127.png	extracted_images\img_128.png							Shostglass	Unknown	"3/4"	Db	Information Extraction	Meter Recognition	What is the meter signature of the piece titled "The Waltz on my bum" as indicated in the ABC notation?	"4/4"	"3/4"	"6/8"	"2/4"	B
QmaEh5BBU6ZW2VdmrPBYoqGP1yiPFnXaw6MaRTKVqcNa46.abc	extracted_images\img_129.png	extracted_images\img_130.png							Shostglass	Unknown	"3/4"	Db	Information Extraction	Key Signature Recognition	What is the key signature of the piece as indicated in the ABC notation?	D major (2 sharps)	D-flat major (5 flats)	B major (5 sharps)	C major (no sharps or flats)	B
QmaEh5BBU6ZW2VdmrPBYoqGP1yiPFnXaw6MaRTKVqcNa46.abc	extracted_images\img_131.png	extracted_images\img_132.png							Shostglass	Unknown	"3/4"	Db	Symbolic Analysis	Note Frequency Statistics	In Voice 1 (V:1), which note appears most frequently in the entire piece?	e	c	d	a	A
QmaEh5BBU6ZW2VdmrPBYoqGP1yiPFnXaw6MaRTKVqcNa46.abc	extracted_images\img_133.png	extracted_images\img_134.png							Shostglass	Unknown	"3/4"	Db	Symbolic Analysis	Instrumentation	Which staves in this score are written in the bass clef, indicating lower-pitched instrumentation?	V:1 and V:2	V:2 and V:3	V:3 and V:4	V:1 and V:4	C
QmaEh5BBU6ZW2VdmrPBYoqGP1yiPFnXaw6MaRTKVqcNa46.abc	extracted_images\img_135.png	extracted_images\img_136.png							Shostglass	Unknown	"3/4"	Db	High-Level Musical Understanding	Mode Identification	Considering the key signature and the accidentals present throughout the melody in Voice 1, which mode is predominantly implied in this piece?	Dorian mode on E	Phrygian mode on D	Lydian mode on A	Mixolydian mode on B	A
QmaEh5BBU6ZW2VdmrPBYoqGP1yiPFnXaw6MaRTKVqcNa46.abc	extracted_images\img_137.png	extracted_images\img_138.png							Shostglass	Unknown	"3/4"	Db	High-Level Musical Understanding	Ornamentation Recognition	In the melody line (V:1), which type of ornamentation is most consistently applied to the repeated patterns throughout the piece?	Mordents indicated by slashes (/) between repeated notes	Grace notes leading into the main note	Trills marked with "tr" symbols above the notes	Appoggiaturas written as small notes before the main note	A
QmaEVo1cuBsmSnj8SzsqtespEhrQuQCMx1Y2qUHHs1iwDQ.abc	extracted_images\img_139.png								Charles' Death	Tyler McKenzie	"4/4"	Gb	Information Extraction	Key Signature Recognition	What is the key signature of the piece "Charles' Death" as indicated in the score?	F major (1 flat)	Gb major (6 flats)	D major (2 sharps)	C minor (3 flats)	B
QmaEVo1cuBsmSnj8SzsqtespEhrQuQCMx1Y2qUHHs1iwDQ.abc	extracted_images\img_140.png								Charles' Death	Tyler McKenzie	"4/4"	Gb	Information Extraction	Voice/Instrument Identification	Which voice in this score consistently plays a pedal tone throughout the first four measures?	V:1 (treble)	V:2 (treble)	V:3 (bass)	V:4 (bass)	C
QmaEVo1cuBsmSnj8SzsqtespEhrQuQCMx1Y2qUHHs1iwDQ.abc	extracted_images\img_141.png								Charles' Death	Tyler McKenzie	"4/4"	Gb	Information Extraction	Title Recognition	What is the title of the piece as indicated in the ABC notation?	Dischordant	Charles' Death	Tyler McKenzie's Lament	Gb Major Etude	B
QmaEVo1cuBsmSnj8SzsqtespEhrQuQCMx1Y2qUHHs1iwDQ.abc	extracted_images\img_142.png								Charles' Death	Tyler McKenzie	"4/4"	Gb	Symbolic Analysis	Note Localization	In which voice and measure does the note E-natural appear as a quarter note with an accent mark?	Voice 1, Measure 5	Voice 2, Measure 1	Voice 3, Measure 4	Voice 1, Measure 2	A
QmaEVo1cuBsmSnj8SzsqtespEhrQuQCMx1Y2qUHHs1iwDQ.abc	extracted_images\img_143.png								Charles' Death	Tyler McKenzie	"4/4"	Gb	Symbolic Analysis	Harmony Identification	In measure 6, which chord is formed by the simultaneous sounding of the notes G, B, and D in the second voice (V:2)?	G major triad	G minor triad	G diminished triad	G augmented triad	A
QmaEVo1cuBsmSnj8SzsqtespEhrQuQCMx1Y2qUHHs1iwDQ.abc	extracted_images\img_144.png								Charles' Death	Tyler McKenzie	"4/4"	Gb	High-Level Musical Understanding	Non-Chord Tone Identification	In measure 2 of Voice 1, which non-chord tone is most clearly functioning as a passing tone?	The E natural between D and F	The G natural between F and A	The A natural between G and B	The D natural between C and E	A
QmaEVo1cuBsmSnj8SzsqtespEhrQuQCMx1Y2qUHHs1iwDQ.abc	extracted_images\img_145.png								Charles' Death	Tyler McKenzie	"4/4"	Gb	High-Level Musical Understanding	Melodic Range	What is the melodic range (interval between lowest and highest notes) in the first voice (V:1) throughout the piece?	A perfect fifth	An octave plus a major second	A minor tenth	A major sixth	C
QmaG48uGJfLC63j7rJrBkbj9ngTp4QCzcuxPS7TEibZ7x3.abc	extracted_images\img_146.png	extracted_images\img_147.png	extracted_images\img_148.png						Rivers and Roads	Originally by The Head and the Heart	"6/8"	C	Information Extraction	Voice/Instrument Identification	Which two voices in this score are written in the bass clef and contain notes in the subcontra and contra octaves (e.g., C,, and lower)?	V:1 and V:2	V:2 and V:4	V:3 and V:4	V:1 and V:3	C
QmaG48uGJfLC63j7rJrBkbj9ngTp4QCzcuxPS7TEibZ7x3.abc	extracted_images\img_149.png	extracted_images\img_150.png	extracted_images\img_151.png						Rivers and Roads	Originally by The Head and the Heart	"6/8"	C	Information Extraction	Key Signature Recognition	What key signature is indicated at the beginning of this score?	C major (no sharps or flats)	G major (one sharp)	F major (one flat)	D minor (one flat)	A
QmaG48uGJfLC63j7rJrBkbj9ngTp4QCzcuxPS7TEibZ7x3.abc	extracted_images\img_152.png	extracted_images\img_153.png	extracted_images\img_154.png						Rivers and Roads	Originally by The Head and the Heart	"6/8"	C	Information Extraction	Meter Recognition	What is the meter of the piece "Rivers and Roads" as indicated in the ABC notation header?	"4/4"	"3/4"	"6/8"	"2/4"	C
QmaG48uGJfLC63j7rJrBkbj9ngTp4QCzcuxPS7TEibZ7x3.abc	extracted_images\img_155.png	extracted_images\img_156.png	extracted_images\img_157.png						Rivers and Roads	Originally by The Head and the Heart	"6/8"	C	Symbolic Analysis	Instrumentation	Which of the following instrumental roles is indicated by the clef and octave markings in the score?	V:1 and V:2 are alto saxophones, V:3 and V:4 are tenor saxophones	V:1 and V:2 are treble instruments (likely melody), V:3 and V:4 are bass instruments (likely bass line)	V:1 and V:2 are piano right hand, V:3 and V:4 are piano left hand	V:1 and V:2 are violins, V:3 and V:4 are cellos	B
QmaG48uGJfLC63j7rJrBkbj9ngTp4QCzcuxPS7TEibZ7x3.abc	extracted_images\img_158.png	extracted_images\img_159.png	extracted_images\img_160.png						Rivers and Roads	Originally by The Head and the Heart	"6/8"	C	High-Level Musical Understanding	Mode Identification	Based on the harmonies and note collections in the score, which mode is predominantly suggested by the use of the chords and melodic material in the piece?	Ionian (Major)	Dorian	Mixolydian	Aeolian (Natural Minor)	A
QmaK7RYmY4JXiK5tYM9AZP36WDc8HwhPXwcmxtKtmmmbEc.abc	extracted_images\img_161.png	extracted_images\img_162.png							Tragic Reconstruction	Shogo Sakai	"3/4"	Eb	Information Extraction	Title Recognition	What is the exact title of the piece as indicated in the ABC notation header?	Tragic Reconstruction	Tragic Reconstruct	Tragic Reconstruction Suite	Tragic Reconstructing	A
QmaK7RYmY4JXiK5tYM9AZP36WDc8HwhPXwcmxtKtmmmbEc.abc	extracted_images\img_163.png	extracted_images\img_164.png							Tragic Reconstruction	Shogo Sakai	"3/4"	Eb	Information Extraction	Meter Recognition	What is the time signature of the piece "Tragic Reconstruction" as indicated in the ABC notation?	"4/4"	"3/4"	"6/8"	"2/4"	B
QmaK7RYmY4JXiK5tYM9AZP36WDc8HwhPXwcmxtKtmmmbEc.abc	extracted_images\img_165.png	extracted_images\img_166.png							Tragic Reconstruction	Shogo Sakai	"3/4"	Eb	Information Extraction	Composer Recognition	Who is credited as the composer of the piece titled "Tragic Reconstruction" in the provided score?	Johann Sebastian Bach	Ludwig van Beethoven	Shogo Sakai	Wolfgang Amadeus Mozart	C
QmaK7RYmY4JXiK5tYM9AZP36WDc8HwhPXwcmxtKtmmmbEc.abc	extracted_images\img_167.png	extracted_images\img_168.png							Tragic Reconstruction	Shogo Sakai	"3/4"	Eb	Symbolic Analysis	Key Modulation Recognition	At which measure does the key signature effectively change from E-flat major to a key that includes an F-sharp accidental, indicating modulation?	Measure 1	Measure 33	Measure 41	Measure 49	C
QmaK7RYmY4JXiK5tYM9AZP36WDc8HwhPXwcmxtKtmmmbEc.abc	extracted_images\img_169.png	extracted_images\img_170.png							Tragic Reconstruction	Shogo Sakai	"3/4"	Eb	High-Level Musical Understanding	Melodic Range	What is the melodic range (interval between the lowest and highest pitch) of the melody in voice V:1 throughout the piece?	Minor third	Perfect fourth	Major sixth	Minor seventh	B
QmaK7RYmY4JXiK5tYM9AZP36WDc8HwhPXwcmxtKtmmmbEc.abc	extracted_images\img_171.png	extracted_images\img_172.png							Tragic Reconstruction	Shogo Sakai	"3/4"	Eb	High-Level Musical Understanding	Functional Harmony Analysis	In the provided ABC notation for "Tragic Reconstruction," what is the harmonic function of the raised A note (^a) in the key of E-flat major as it appears in the melody line of V:1?	It functions as the leading tone to the tonic (Eb major).	It acts as the raised fourth scale degree implying a Lydian mode coloration.	It serves as the augmented sixth in a German augmented sixth chord.	It is a chromatic passing tone without a specific harmonic function.	B
